# Supplementary material for: Paracrine rescue of MYR1-deficient Toxoplasma gondii mutants reveals limitations of pooled in vivo CRISPR screens
Source: eLife journal article supplement (doi:10.7554/elife.102592), 2024-10-15
Supplement: fig1-data4 [file elife-102592-fig1-data4-v1.zip]

Pru $\Delta$ KU80 (WT)

Pru $\Delta$ KU80  $\Delta$ MYR1( $\Delta$ MYR1)

Experiment 1

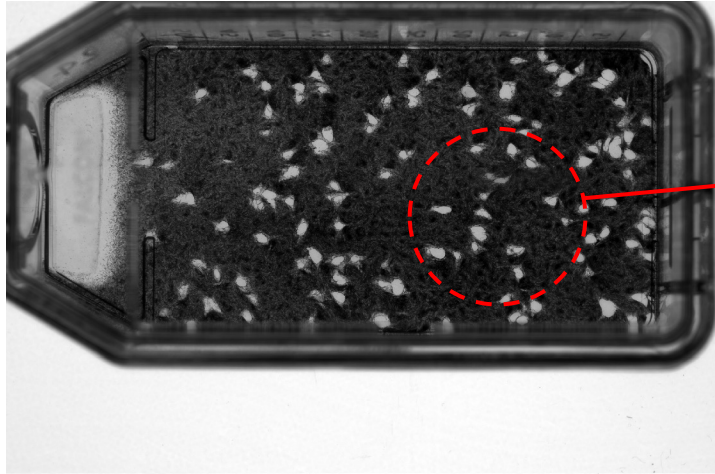

Area used as  
representative  
in figure

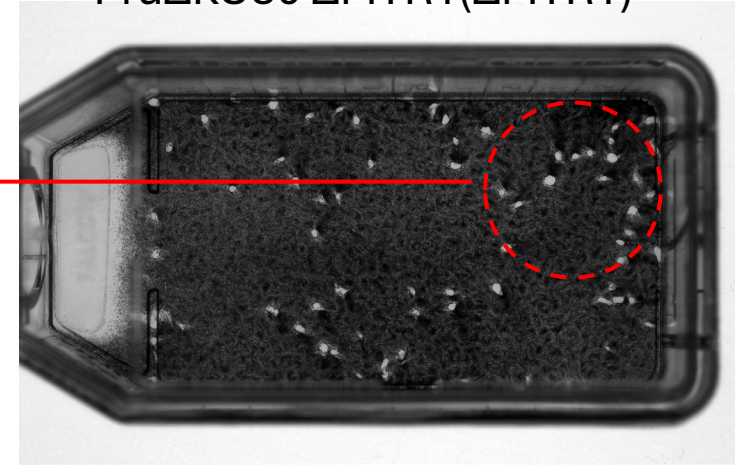

Experiment 2

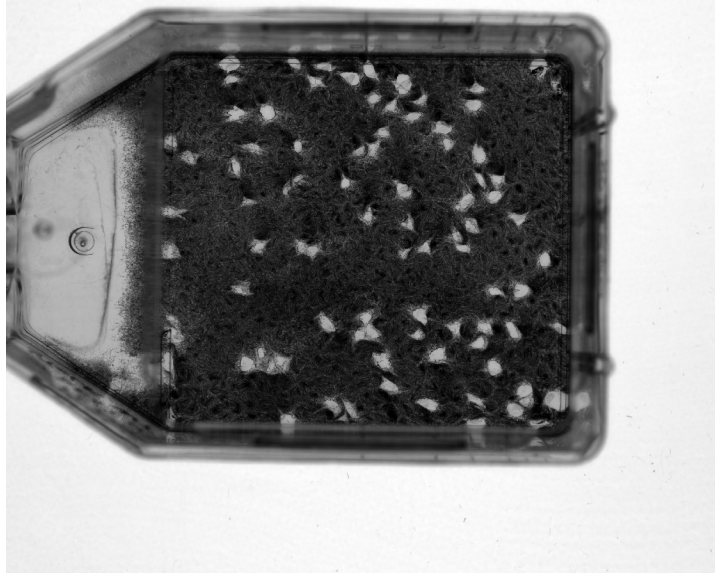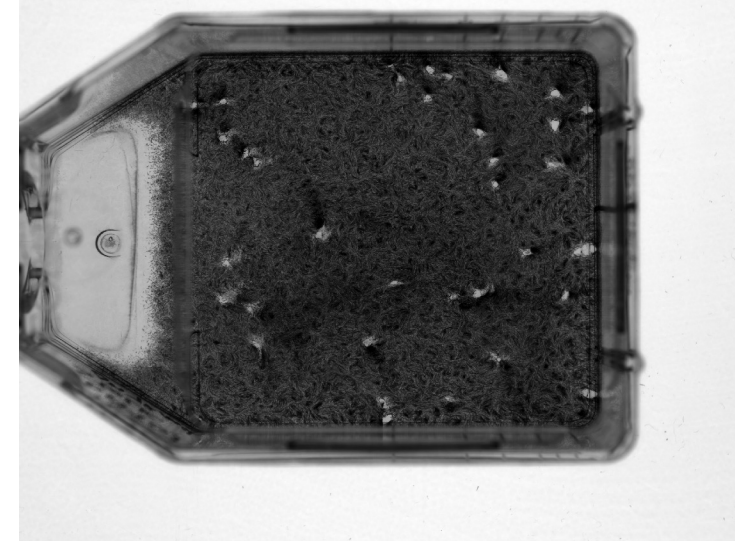

Figure 1 – source data 4. Original images of Figure 1, panel D. The plaque area of parental Pru $\Delta$ KU80 and derived Pru $\Delta$ MYR1 strains was measured via FIJI and compared.
