# Supplementary material for: Paracrine rescue of MYR1-deficient Toxoplasma gondii mutants reveals limitations of pooled in vivo CRISPR screens
Source: eLife journal article supplement (doi:10.7554/elife.102592), 2024-10-15
Supplement: fig1-figsupp1-data1 [file elife-102592-fig1-figsupp1-data1-v1.zip]

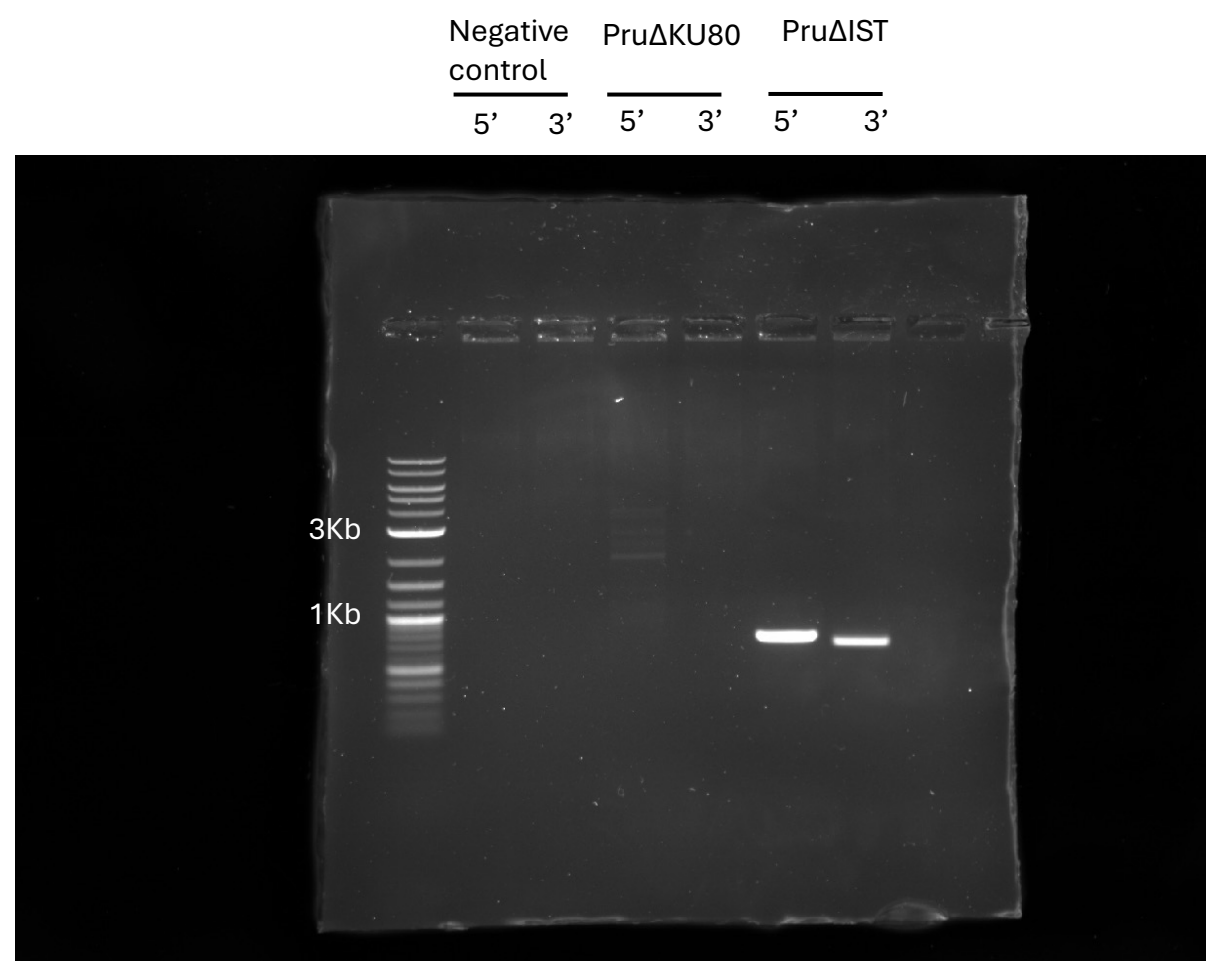

3Kb

1Kb

Figure 1 – Figure Supplement 1 – source data 1. PCR validation of the established PruΔIST strain compared to parental PruΔKU80 control. The 5' and 3' sites of the endogenous IST locus were checked for integration of the mCherry::HXGPRT repair cassette.
