# Supplementary material for: Paracrine rescue of MYR1-deficient Toxoplasma gondii mutants reveals limitations of pooled in vivo CRISPR screens
Source: eLife journal article supplement (doi:10.7554/elife.102592), 2024-10-15
Supplement: fig2-data1 [file elife-102592-fig2-data1-v1.zip]

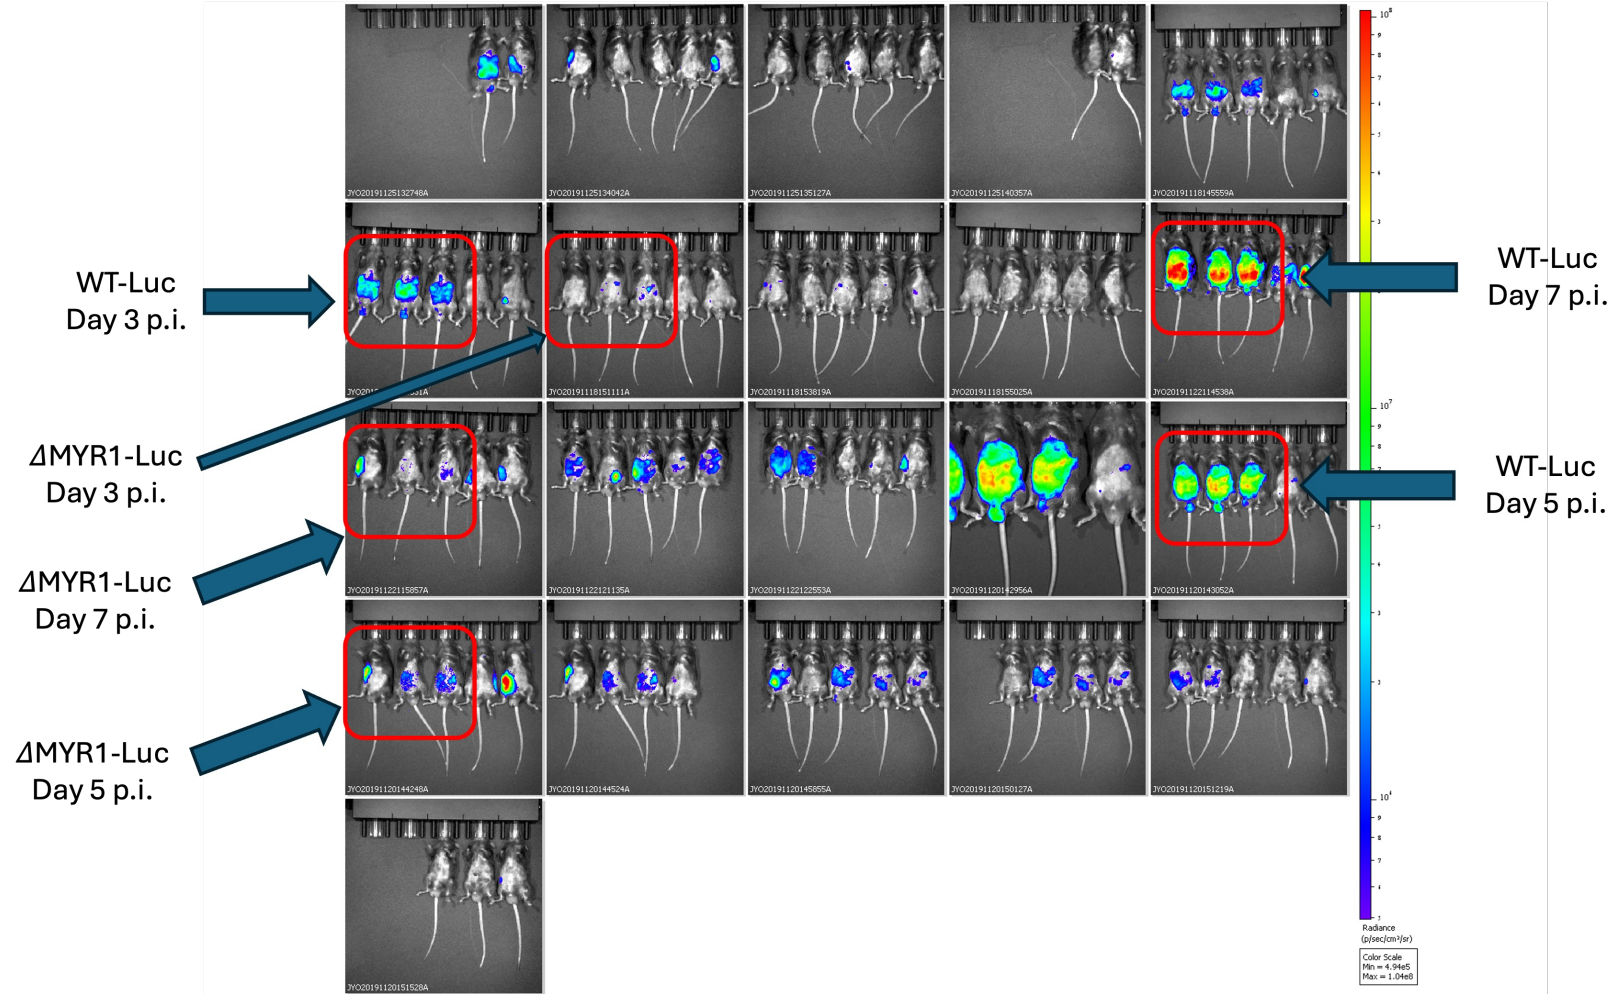

Figure 2 – source data 1. Original images of C57BL/6J mice infected with WT-Luc or  $\Delta$ MYR1-Luc and assessed for parasite growth via intravital imaging at day 3, 5 and 7 post infection. Highlighted the images used as representative in Figure 2, panel B.
