# Supplementary material for: Paracrine rescue of MYR1-deficient Toxoplasma gondii mutants reveals limitations of pooled in vivo CRISPR screens
Source: eLife journal article supplement (doi:10.7554/elife.102592), 2024-10-15
Supplement: fig2-data4 [file elife-102592-fig2-data4-v1.zip]

Green filter

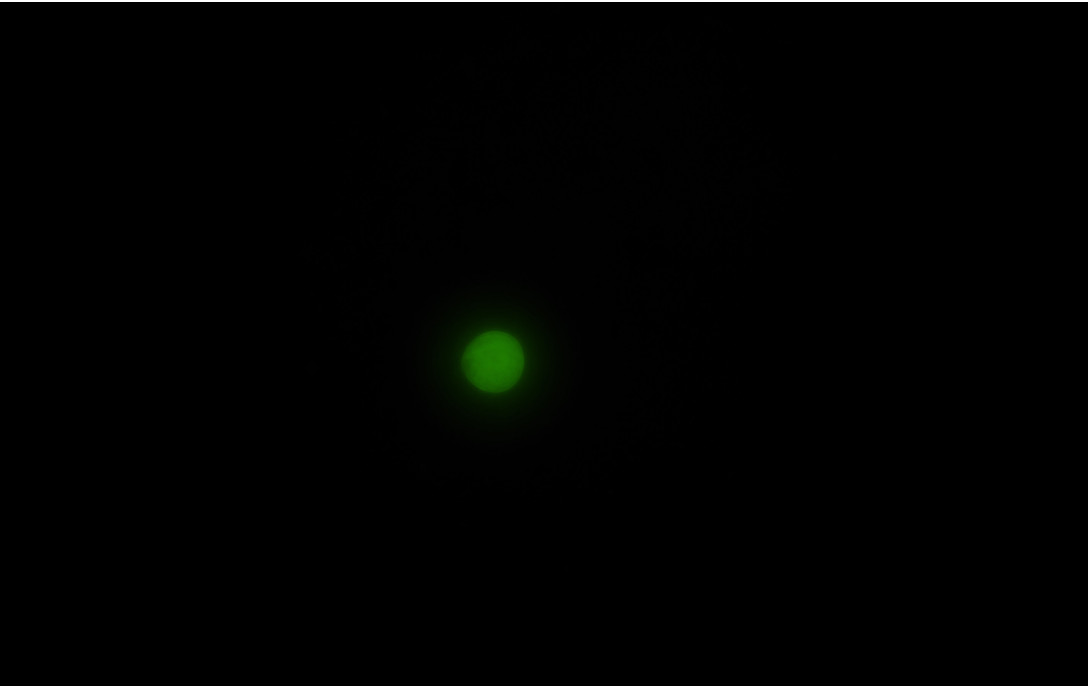

Red filter

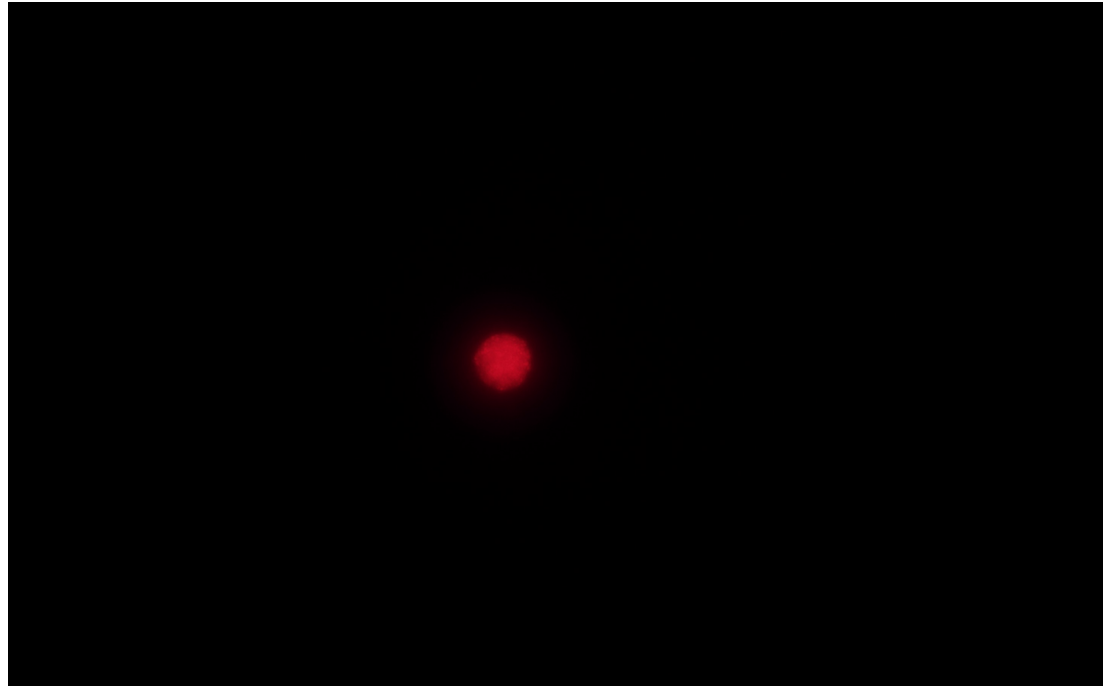

Figure 2 – source data 4. Original images of a Pru  $\Delta$ MYR1 cyst (expressing constitutive mCherry) recovered from the brain of an infected C57BL/6J mouse. The brain lysate was stained with a FITC-conjugated Dolichos Biflorus Agglutinin and imaged with an inverted Ti-E Nikon microscope with LED light filters and an Olympus DF74 camera at 40x magnification.
