# Supplementary material for: Paracrine rescue of MYR1-deficient Toxoplasma gondii mutants reveals limitations of pooled in vivo CRISPR screens
Source: eLife journal article supplement (doi:10.7554/elife.102592), 2024-10-15
Supplement: fig2-figsupp1-data1 [file elife-102592-fig2-figsupp1-data1-v1.zip]

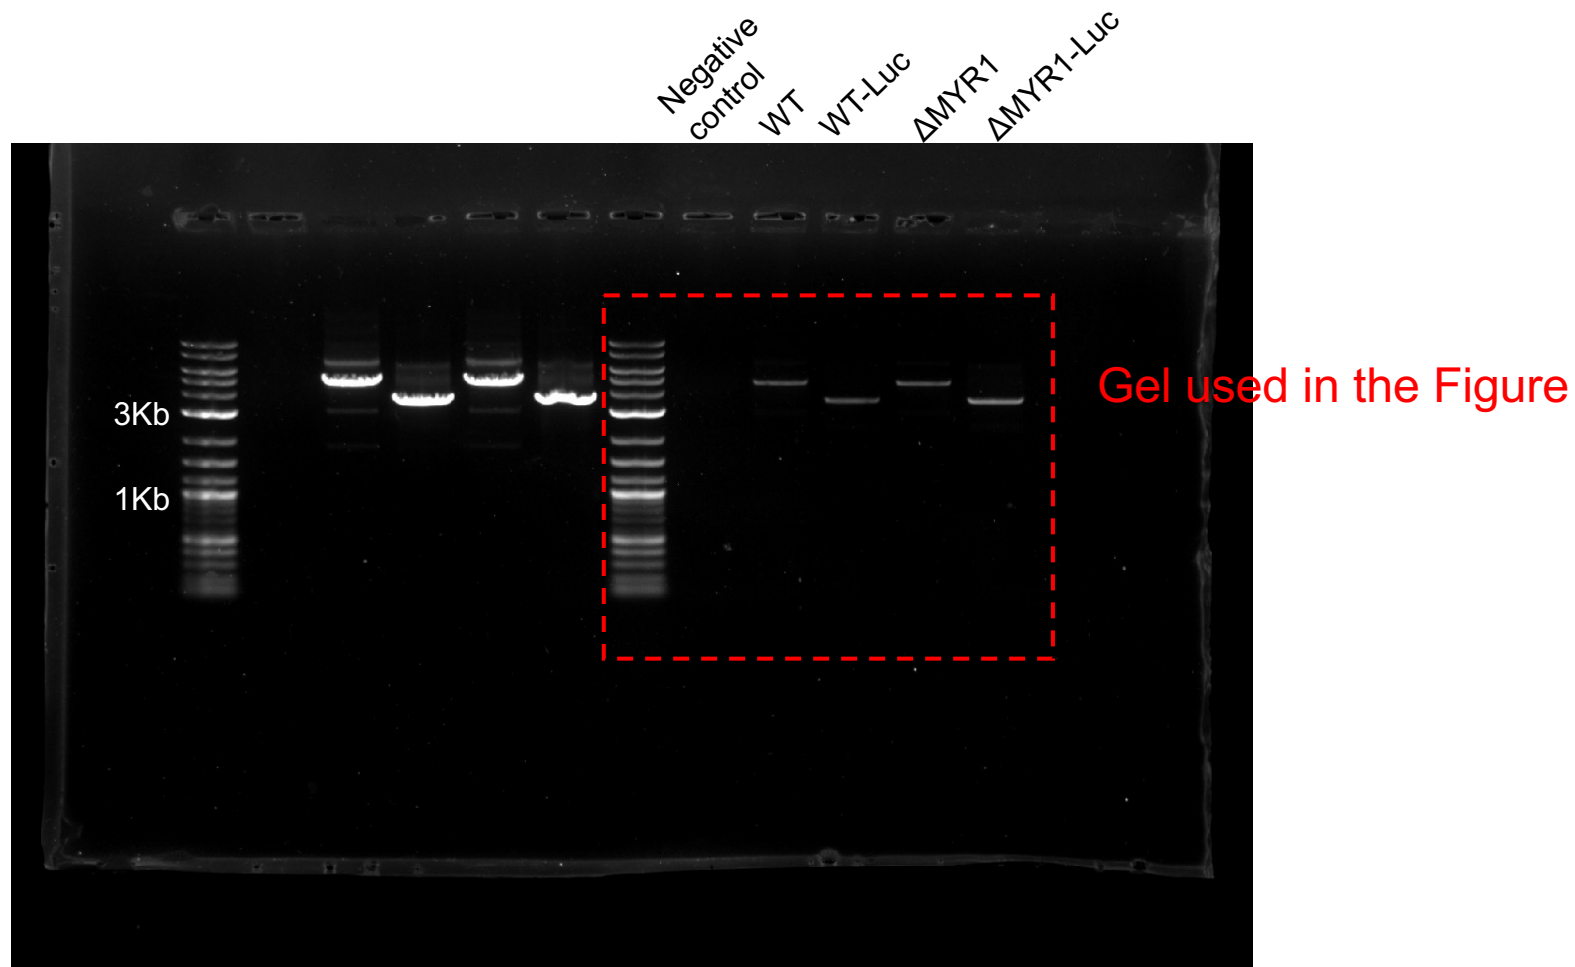

Figure 2 – Figure Supplement 1 – source data 1. PCR validation of the established PruΔKu80-LucHA (WT-Luc) and PruΔKu80ΔMYR1-LucHA (ΔMYR1-Luc) strains compared to their respective parental strains PruΔKU80 (WT) and PruΔKu80ΔMYR1 (ΔMYR1). The endogenous *Uprt* locus was checked for integration of the Luciferase gene.
