# Supplementary material for: Paracrine rescue of MYR1-deficient Toxoplasma gondii mutants reveals limitations of pooled in vivo CRISPR screens
Source: eLife journal article supplement (doi:10.7554/elife.102592), 2024-10-15
Supplement: fig3-data1 [file elife-102592-fig3-data1-v1.zip]

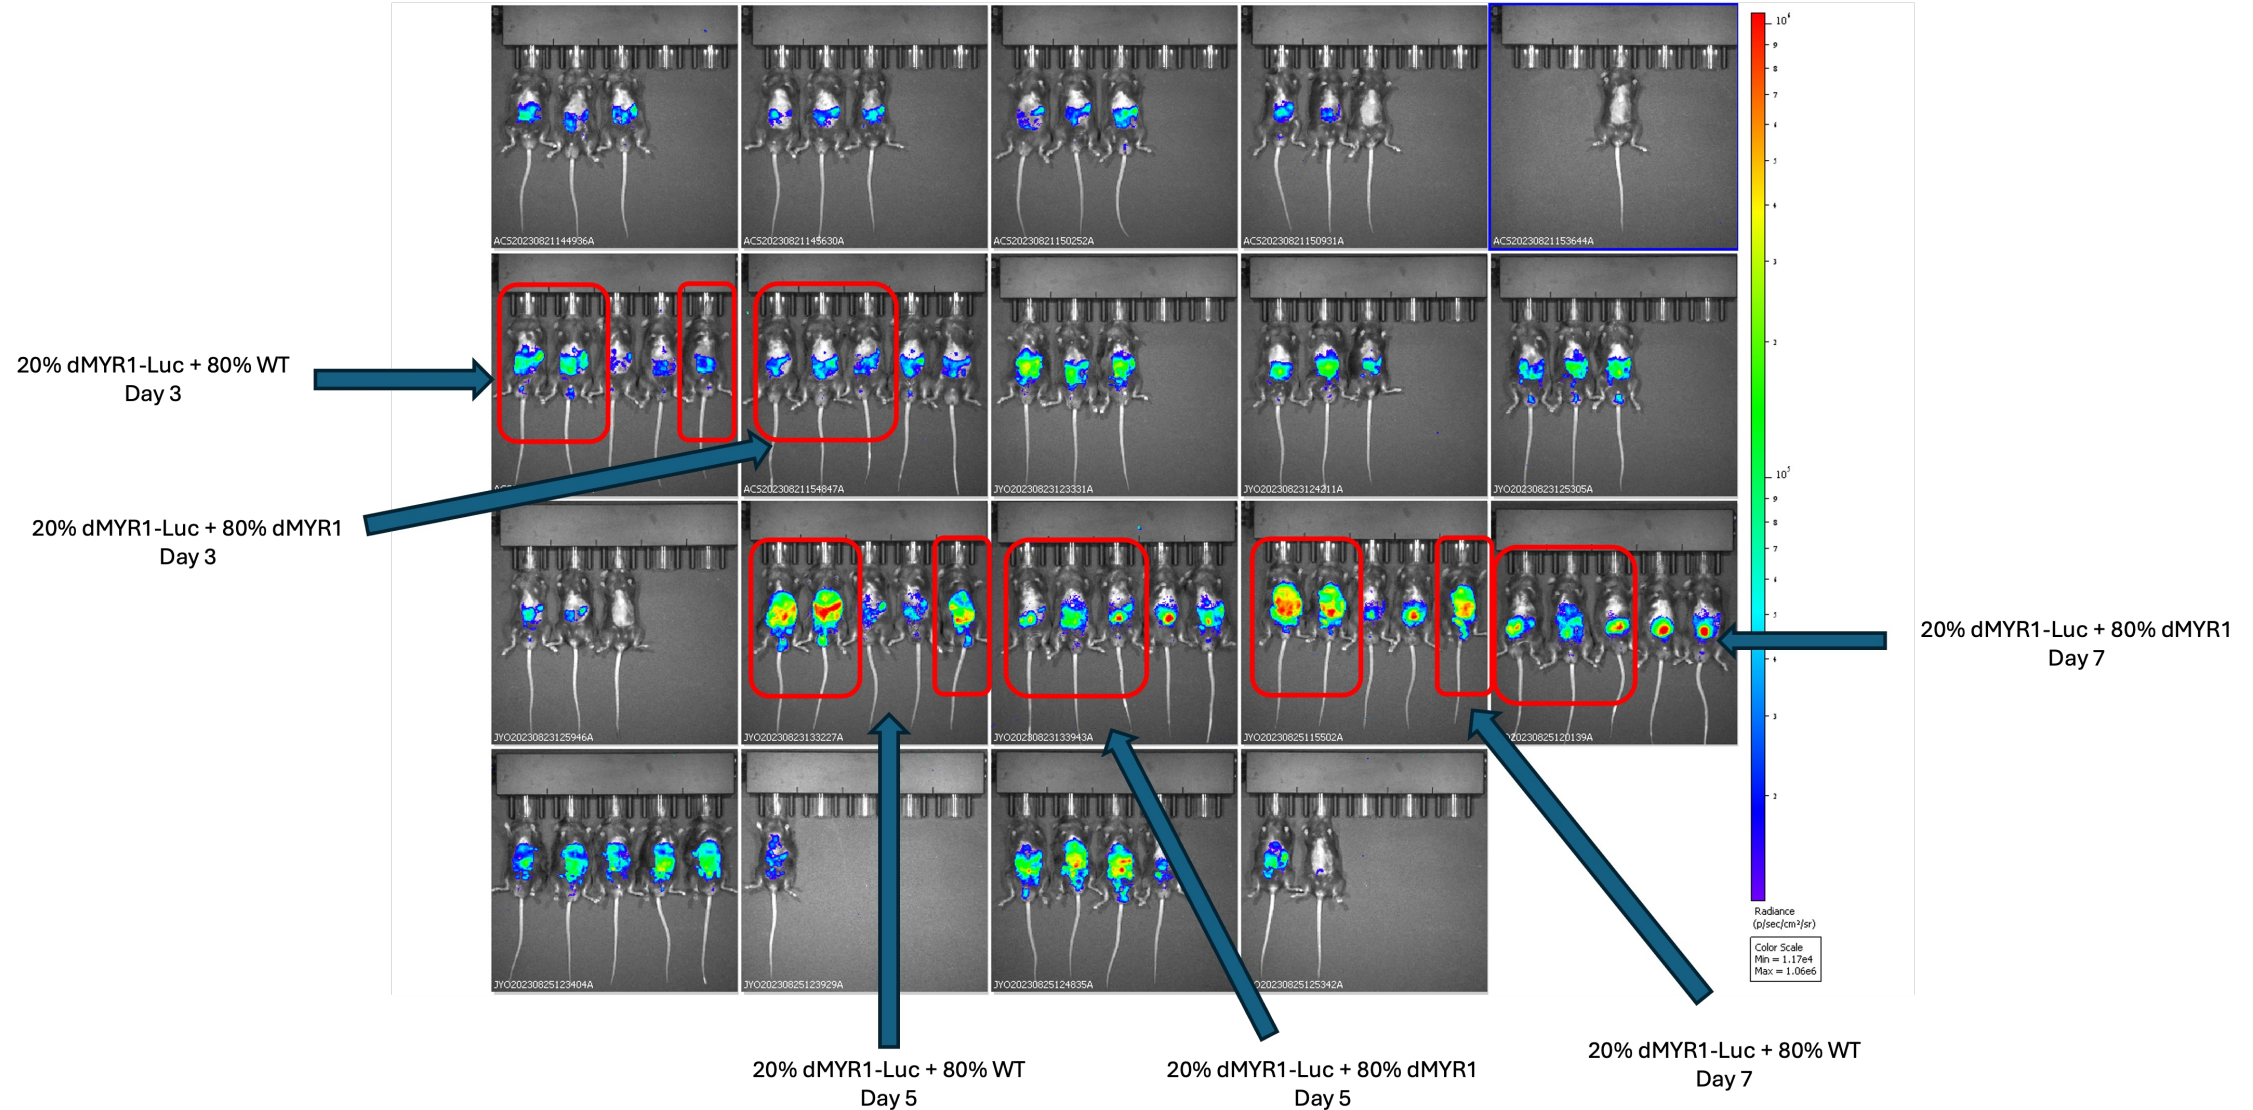

Figure 3 – source data 1. Original images of C57BL/6J mice infected with a mixed infection of 20:80  $\Delta$ MYR1-Luc:WT or  $\Delta$ MYR1 parasites.  $\Delta$ MYR1-Luc parasite growth was assessed via intravital imaging at day 3, 5 and 7 post infection. Highlighted the images used as representative in Figure 3, panel B.
