# Supplementary material for: Paracrine rescue of MYR1-deficient Toxoplasma gondii mutants reveals limitations of pooled in vivo CRISPR screens
Source: eLife. 2024 Dec 10;13:RP102592. doi: 10.7554/eLife.102592 (PMC11630813; doi:10.7554/eLife.102592)
Supplement: Figure 1—source data 1. [file elife-102592-fig1-data1.xlsx]

## Sheet: Fig1a EXP1 230120
Database Name	Pheinx
Database Location	http://1400l18172/ODA/OdaService.asmx
Evaluation Signature	ab2c1dae-7e8e-45b6-be2b-3c887669768b
Plate Name	joanna 2301 plate 1 exp 120220
Measurement	Measurement 1
Evaluation	Evaluation1
[Data]
Row	Column	Timepoint	infected cell - Number of Objects	infected cell - Number of toxo Selected- per Cell - Mean per Well	Nuclei - Number of Objects	Nuclei - Intensity Nucleus HOECHST 33342 Mean - Mean per Well	Nuclei - Total Spot Area - Mean per Well	Nuclei - Relative Spot Intensity - Mean per Well	Nuclei - Number of Spots - Mean per Well	Nuclei - Number of Spots per Area of Cytoplasm - Mean per Well	Nuclei - Number of toxo Selected- per Cell - Mean per Well	Nuclei - Relative Spot Intensity- Mean per Cell - Mean per Well	Nuclei - Corrected Spot Intensity- Mean per Cell - Mean per Well	Nuclei - Uncorrected Spot Peak Intensity- Mean per Cell - Mean per Well	Nuclei - Spot Contrast- Mean per Cell - Mean per Well	Nuclei - Spot Background Intensity- Mean per Cell - Mean per Well	Nuclei - Spot Area [px¬≤]- Mean per Cell - Mean per Well	Nuclei - Region Intensity- Mean per Cell - Mean per Well	Nuclei - Spot to Region Intensity- Mean per Cell - Mean per Well	Nuclei - Intensity toxo Mean- Mean per Cell - Mean per Well	Nuclei - Intensity toxo Median- Mean per Cell - Mean per Well	Nuclei - Intensity toxo Sum- Mean per Cell - Mean per Well	Nuclei - toxo Area [¬µm¬≤]- Mean per Cell - Mean per Well	Nuclei - toxo Roundness- Mean per Cell - Mean per Well	Nuclei - toxo Width [¬µm]- Mean per Cell - Mean per Well	Nuclei - toxo Length [¬µm]- Mean per Cell - Mean per Well	Nuclei - toxo Ratio Width to Length- Mean per Cell - Mean per Well	Nuclei - infected cell - Mean per Well	infected 1 toxo per cell - Number of Objects	infected 2 toxo per cell - Number of Objects	infected>=4 per cell - Number of Objects	infected>=6 toxo per cell - Number of Objects	infected>=8 toxo per cell - Number of Objects	percent infected cell			Percent >4 toxo per cell	percent>6 toxo per cell	percent>8 toxo per vac	percent 1 toxo only	percent 2 toxo only	Number of Analyzed Fields	Time [s]	Compound	Concentration	Cell Type	Cell Count
3	3	0	680	3.02059	5241	189.442	78.3847	0.0644165	2.54646	0.000597129	0.39191	0.887892	4250.95	6815.24	0.864301	378.09	99.9685	542.233	9.41651	4629.04	4677.12	496859	8.71979	0.882917	2.22821	3.84635	0.592342	0.129746	155	182	207	58	26	12.9746	11.2839		30.4412	8.52941	3.82353	22.7941	26.7647	38	0
3	4	0	360	3.28333	2986	1542.56	234.484	0.0573937	7.83456	0.00129474	0.395847	0.867807	3842.32	6253.74	0.838553	445.592	103.181	533.999	8.60248	4287.91	4320.12	465958	9	0.885442	2.25711	3.96685	0.583381	0.120563	58	88	132	40	14	12.0563			36.6667	11.1111	3.88889	16.1111	24.4444	38	0
3	5	0	273	3.61538	3095	1541.33	197.438	0.0442793	6.70307	0.00115504	0.318901	0.873873	3904.62	6435.83	0.84546	442.504	96.7632	563.293	8.44462	4347.13	4361.32	440653	8.44021	0.89367	2.22752	3.80828	0.597638	0.0882068	40	55	130	43	15	8.82068			47.619	15.7509	5.49451	14.652	20.1465	38	0
3	6	0	233	4.13734	2834	1545.72	255.159	0.0272446	10.0935	0.00140979	0.340155	0.720746	2321.85	4427.41	0.681333	406.093	63.185	352.623	7.39394	2727.95	2667.09	203560	5.51134	0.856345	1.69696	3.04076	0.576799	0.0822159	73	49	80	56	41	8.22159	6.88762	61.0396	34.3348	24.0343	17.5966	31.3305	21.03	38	0
3	7	0	160	3.75625	3201	1530.42	209.695	0.0196804	8.13933	0.00119654	0.187754	0.73298	2736.45	5188.43	0.693336	416.654	68.2237	361.067	8.50459	3153.1	3086.43	236222	5.95084	0.85812	1.75547	3.16188	0.572544	0.0499844	49	30	51	32	22	4.99844			31.875	20	13.75	30.625	18.75	38	0
3	8	0	218	4.27064	2929	1494.21	256.592	0.0251343	9.99829	0.00142542	0.317856	0.716031	2194	4276.06	0.673739	403.127	63.5982	358.302	7.07818	2597.13	2530.46	188375	5.54738	0.850715	1.68804	3.07162	0.567904	0.0744281	66	38	84	56	36	7.44281			38.5321	25.6881	16.5138	30.2752	17.4312	38	0
3	9	0	388	3.40979	3118	1532.21	234.923	0.0568577	7.88037	0.001164	0.42431	0.862817	3908.55	6369.28	0.832752	443.265	104.938	510.156	9.10575	4351.82	4387.54	489176	9.15325	0.873156	2.23948	4.07651	0.561007	0.124439	51	111	143	54	20	12.4439	15.4133		36.8557	13.9175	5.15464	13.1443	28.6082	38	0
3	10	0	369	3.4065	2853	1507.44	235.507	0.0541542	7.76306	0.0011318	0.440589	0.853979	3618.01	6063	0.823851	436.653	101.393	478.923	9.10528	4054.66	4066.58	436586	8.84405	0.8822	2.22932	3.92659	0.578022	0.129338	63	90	136	50	23	12.9338			36.8564	13.5501	6.23306	17.0732	24.3902	38	0
3	11	0	629	3.89984	3015	1398.46	256.769	0.0864081	8.07927	0.00127422	0.813599	0.866104	3678.17	6163.91	0.837367	436.436	92.7833	505.806	8.72523	4114.61	4097.35	398199	8.09306	0.888334	2.14948	3.77319	0.579697	0.208624	84	121	300	123	57	20.8624			47.6948	19.5548	9.062	13.3545	19.2369	38	0
4	3	0	342	3.66667	3274	1585.59	163.591	0.0259988	5.05406	0.000884881	0.383018	0.673048	895.113	1773.92	0.608345	418.539	115.973	321.881	4.19194	1313.65	1328.89	152979	10.1158	0.889254	2.439	4.20275	0.591301	0.104459	43	74	161	55	15	10.4459	8.68784		47.076	16.0819	4.38596	12.5731	21.6374	38	0
4	4	0	311	3.39228	3923	1577.19	141.579	0.020547	4.56309	0.000798401	0.268927	0.672979	916.034	1827.05	0.610232	423.212	117.77	323.394	4.25933	1339.25	1354.39	157066	10.2726	0.879698	2.43151	4.33278	0.572986	0.0792761	48	76	132	46	12	7.92761			42.4437	14.791	3.85852	15.4341	24.4373	38	0
4	5	0	255	3.69412	3316	1583.94	159.512	0.0219611	5.12696	0.000865945	0.284077	0.675098	943.102	1874.15	0.611403	424.372	122.48	325.961	4.32743	1367.47	1386.31	166893	10.6834	0.880232	2.46274	4.36535	0.575785	0.0768999	34	61	125	43	11	7.68999			49.0196	16.8627	4.31373	13.3333	23.9216	38	0
4	6	0	39	1.66667	3294	1530.23	130.265	0.00702039	4.93048	0.000743575	0.0197328	0.76285	1312.34	2892.04	0.749538	332.478	80.7756	271.484	6.11482	1644.82	1585.59	132993	7.04569	0.921716	2.04289	3.38761	0.621552	0.0118397	23	10	4	0	0	1.18397	1.01855	11.7238	10.2564	0	0	58.9744	25.641	38	0
4	7	0	27	1.55556	2854	1495.89	159.141	0.00776754	6.10652	0.000891868	0.0147162	0.772058	1539.07	3327.65	0.756566	338.211	76.7469	264.575	7.24471	1877.28	1800.6	145796	6.69428	0.896349	1.9578	3.45266	0.581405	0.00946041	15	9	0	0	0	0.946041			0	0	0	55.5556	33.3333	38	0
4	8	0	29	1.62069	3133	1565.85	138.174	0.00723244	5.08299	0.000751597	0.0150016	0.761094	1366.26	2912.98	0.730834	338.215	83.0747	267.002	6.37554	1704.48	1629.72	140038	7.24623	0.878409	1.92581	3.59692	0.546845	0.0092563	16	10	2	0	0	0.92563			6.89655	0	0	55.1724	34.4828	38	0
4	9	0	401	3.44389	3593	1596.11	152.113	0.023073	4.49012	0.000701309	0.384358	0.685055	941.078	1881.56	0.628748	406.302	119.541	304.982	4.55413	1347.38	1357.86	160900	10.427	0.87895	2.44656	4.3861	0.566728	0.111606	70	94	153	66	24	11.1606	11.6663		38.1546	16.4589	5.98504	17.4564	23.4414	38	0
4	10	0	449	3.65702	3694	1596.53	166.143	0.0262499	4.77856	0.000825021	0.444505	0.675032	914.319	1841.13	0.616785	415.572	116.257	314.284	4.324	1329.89	1340.19	154702	10.1406	0.873662	2.3852	4.32355	0.561271	0.121548	70	92	207	86	24	12.1548			46.1024	19.1537	5.34521	15.5902	20.49	38	0
4	11	0	397	3.95214	3398	1506.24	182.802	0.0258285	5.53943	0.000924188	0.461742	0.666751	874.993	1800.62	0.60958	415.658	113.489	314.007	4.24334	1290.65	1293.55	146007	9.89916	0.879846	2.39618	4.25943	0.571924	0.116833	61	80	197	97	37	11.6833			49.6222	24.4332	9.3199	15.3652	20.1511	38	0
5	3	0	191	3.25131	3646	1572.05	130.953	0.0195462	4.68294	0.000842131	0.170324	0.765282	1524.62	2761.98	0.714899	432.278	114.39	375.408	5.42496	1956.9	1976.83	227677	9.9777	0.870072	2.33073	4.35034	0.549951	0.0523862	22	52	70	18	4	5.23862	5.88926		36.6492	9.42408	2.09424	11.5183	27.2251	38	0
5	4	0	233	3.48069	3665	1606.08	147.332	0.0236698	5.01364	0.000854871	0.221282	0.771915	1610.53	2904.94	0.721332	435.012	114.377	389.95	5.51323	2045.55	2065.35	237855	9.97662	0.870634	2.32884	4.32094	0.550439	0.0635744	28	62	101	35	9	6.35744			43.3476	15.0215	3.86266	12.0172	26.6094	38	0
5	5	0	215	3.36744	3541	1555.64	153.512	0.0226126	5.17114	0.000887758	0.204462	0.772544	1598.38	2862.98	0.721864	432.748	120.602	372.959	5.65872	2031.12	2050.4	250094	10.5196	0.871846	2.39953	4.47629	0.547962	0.0607173	20	63	84	28	6	6.07173			39.0698	13.0233	2.7907	9.30233	29.3023	38	0
5	6	0	65	2.43077	3082	1555.26	155.447	0.0104287	5.97242	0.000897336	0.0512654	0.781876	1806.92	3582.29	0.748215	384.476	83.6246	329.797	6.99723	2191.4	2142.32	191557	7.29419	0.883115	2.00296	3.59199	0.576036	0.0210902	23	16	11	3	2	2.10902	2.1449	36.4205	16.9231	4.61538	3.07692	35.3846	24.6154	38	0
5	7	0	59	2.32203	2834	1531.7	181.095	0.0116564	6.69654	0.00101225	0.0483416	0.76825	1868.91	3590.4	0.736805	397.156	80.6749	326.674	7.09577	2266.07	2222.31	189160	7.0369	0.873066	1.91526	3.56156	0.556444	0.0208186	21	20	9	3	2	2.08186			15.2542	5.08475	3.38983	35.5932	33.8983	38	0
5	8	0	67	2.49254	2986	1508.28	174.391	0.012151	6.92096	0.00102626	0.0559277	0.738009	1693.04	3454	0.702242	367.674	72.9663	306.036	6.78003	2060.71	2014.35	158623	6.36451	0.864385	1.8324	3.35699	0.573485	0.022438	30	14	14	9	3	2.2438			20.8955	13.4328	4.47761	44.7761	20.8955	38	0
5	9	0	286	2.84965	3545	1520.27	155.234	0.0245137	5.22116	0.000802386	0.229901	0.802432	1842.7	3322.57	0.761507	417.698	116.961	340.932	6.84221	2260.39	2264.49	268533	10.2019	0.868553	2.34606	4.40878	0.540428	0.080677	48	102	81	18	6	8.0677	7.89988		28.3217	6.29371	2.0979	16.7832	35.6643	38	0
5	10	0	233	2.75536	3695	1517.78	145.206	0.0189016	5.03627	0.000790764	0.173748	0.795407	1808.43	3269.75	0.754238	419.348	114.308	343.112	6.69577	2227.78	2228.07	258120	9.97053	0.873907	2.32881	4.30975	0.549977	0.0630582	51	63	59	15	1	6.30582			25.3219	6.43777	0.429185	21.8884	27.0386	38	0
5	11	0	328	3.46341	3517	1528.68	169.022	0.0297176	5.22377	0.000852015	0.323003	0.784231	1687.56	3069.41	0.738721	424.729	114.557	370.576	5.9824	2112.29	2117.03	245467	9.99227	0.866199	2.31875	4.35853	0.542023	0.0932613	48	79	128	44	18	9.32613			39.0244	13.4146	5.4878	14.6341	24.0854	38	0
6	3	0	555	4.37117	2821	1575.28	260.954	0.0683253	7.57639	0.00143087	0.859979	0.791573	1786.67	3147.81	0.74071	435.326	102.684	410.665	5.73353	2221.99	2219.31	229269	8.95669	0.894582	2.33242	3.93414	0.604602	0.196739	43	80	358	147	52	19.6739	16.6321		64.5045	26.4865	9.36937	7.74775	14.4144	38	0
6	4	0	525	3.77524	3469	1607.79	195.662	0.0496098	5.83915	0.000968269	0.571346	0.783509	1729	3087.08	0.735099	434.811	111.685	389.546	5.84461	2163.81	2178.41	245956	9.74177	0.883265	2.35616	4.19497	0.573193	0.15134	50	120	239	93	35	15.134			45.5238	17.7143	6.66667	9.52381	22.8571	38	0
6	5	0	435	3.94023	2883	1604.27	233.571	0.0531769	7.08949	0.00121116	0.59452	0.792347	1818.81	3200.52	0.743135	439.389	109.622	402.148	5.94012	2258.2	2272.64	249084	9.56184	0.883161	2.35835	4.1493	0.581756	0.150884	38	81	234	90	26	15.0884			53.7931	20.6897	5.97701	8.73563	18.6207	38	0
6	6	0	193	2.45078	2779	1615.52	216.801	0.0221843	7.73012	0.00109351	0.170205	0.819834	2375.25	4499.55	0.794594	373.277	84.8655	314.796	8.88582	2748.53	2690.18	228975	7.40243	0.898519	2.06203	3.51537	0.595301	0.0694494	67	64	32	14	4	6.94494	7.38893	44.4257	16.5803	7.25389	2.07254	34.715	33.1606	38	0
6	7	0	187	2.54545	2447	1489.87	232.635	0.0229649	8.7123	0.00119996	0.194524	0.841264	2746.54	5271.62	0.818872	370.714	77.2679	312.994	10.1582	3117.25	3041.22	245465	6.73972	0.899551	1.97659	3.34133	0.601057	0.0764201	56	64	34	9	6	7.64201			18.1818	4.81283	3.20856	29.9465	34.2246	38	0
6	8	0	197	2.38579	2599	1593.38	207.612	0.022644	7.43825	0.00108813	0.180839	0.814347	2376.89	4697.5	0.787276	374.457	80.4906	308.103	9.04755	2751.35	2677.92	229149	7.02082	0.898277	2.00354	3.42503	0.594048	0.0757984	79	53	34	10	7	7.57984			17.2589	5.07614	3.5533	40.1015	26.9036	38	0
6	9	0	424	3.47642	3283	1590.17	151.624	0.0384849	4.576	0.000706743	0.44898	0.79233	1770.44	3167.54	0.748591	423.161	111.113	366.442	6.29035	2193.61	2200.32	249106	9.69192	0.876829	2.33794	4.24488	0.559735	0.12915	61	89	178	61	17	12.915	15.5841		41.9811	14.3868	4.00943	14.3868	20.9906	38	0
6	10	0	513	3.92398	3650	1570.25	160.907	0.0448587	4.56274	0.000837274	0.551507	0.786854	1724.61	3078.78	0.74053	428.773	106.397	393.542	5.76159	2153.38	2159.25	232811	9.28052	0.876841	2.28433	4.12732	0.563274	0.140548	53	92	265	99	33	14.0548			51.6569	19.2982	6.43275	10.3314	17.9337	38	0
6	11	0	509	4.17682	2573	1519.05	215.386	0.0595331	6.26467	0.000973105	0.826273	0.794274	1782.35	3193.6	0.750474	418.564	105.249	372.193	6.27422	2200.91	2199.4	235390	9.18037	0.879421	2.28126	4.08357	0.567351	0.197824	61	91	267	121	52	19.7824			52.4558	23.7721	10.2161	11.9843	17.8782	38	0

## Sheet: Fig1a EXP2 060220
Database Name	Pheinx
Database Location	http://1400l18172/ODA/OdaService.asmx
Evaluation Signature	e9ed39eb-7df1-4b9c-8e3b-37cf8637ac9f
Plate Name	joanna 602 exp 120220
Measurement	Measurement 2
Evaluation	Evaluation1
[Data]
Row	Column	Timepoint	infected cell - Number of Objects	infected cell - Number of toxo Selected- per Cell - Mean per Well	Nuclei - Number of Objects	Nuclei - Intensity Nucleus HOECHST 33342 Mean - Mean per Well	Nuclei - Total Spot Area - Mean per Well	Nuclei - Relative Spot Intensity - Mean per Well	Nuclei - Number of Spots - Mean per Well	Nuclei - Number of Spots per Area of Cytoplasm - Mean per Well	Nuclei - Number of toxo Selected- per Cell - Mean per Well	Nuclei - Relative Spot Intensity- Mean per Cell - Mean per Well	Nuclei - Corrected Spot Intensity- Mean per Cell - Mean per Well	Nuclei - Uncorrected Spot Peak Intensity- Mean per Cell - Mean per Well	Nuclei - Spot Contrast- Mean per Cell - Mean per Well	Nuclei - Spot Background Intensity- Mean per Cell - Mean per Well	Nuclei - Spot Area [px¬≤]- Mean per Cell - Mean per Well	Nuclei - Region Intensity- Mean per Cell - Mean per Well	Nuclei - Spot to Region Intensity- Mean per Cell - Mean per Well	Nuclei - Intensity toxo Mean- Mean per Cell - Mean per Well	Nuclei - Intensity toxo Median- Mean per Cell - Mean per Well	Nuclei - Intensity toxo Sum- Mean per Cell - Mean per Well	Nuclei - toxo Area [¬µm¬≤]- Mean per Cell - Mean per Well	Nuclei - toxo Roundness- Mean per Cell - Mean per Well	Nuclei - toxo Width [¬µm]- Mean per Cell - Mean per Well	Nuclei - toxo Length [¬µm]- Mean per Cell - Mean per Well	Nuclei - toxo Ratio Width to Length- Mean per Cell - Mean per Well	Nuclei - infected cell - Mean per Well	infected 1 toxo per cell - Number of Objects	infected 2 toxo per cell - Number of Objects	infected>=4 per cell - Number of Objects	infected>=6 toxo per cell - Number of Objects	infected>=8 toxo per cell - Number of Objects	percent infected cell			Percent >4 toxo per cell	percent>6 toxo per cell	percent>8 toxo per vac	percent 1 toxo only	percent 2 toxo only	Number of Analyzed Fields	Time [s]	Compound	Concentration	Cell Type	Cell Count
3	3	0	644	3.49379	6026	1538.94	189.967	0.0515487	5.89247	0.0014428	0.373382	0.854204	3295.94	5465.04	0.822603	456.2	101.19	594.028	7.0775	3752.14	3769.89	393971	8.82637	0.868348	2.153	4.06195	0.549448	0.10687	115	148	261	101	40	10.687	12.9674		40.528	15.6832	6.21118	17.8571	22.9814	38	0
3	4	0	733	3.77217	5003	1543.31	238.317	0.0692168	6.69718	0.00157964	0.552668	0.852204	3277.94	5427.2	0.819226	464.168	97.2344	609.34	6.79998	3742.11	3755.71	376043	8.48132	0.867908	2.12912	3.97817	0.553985	0.146512	112	136	334	132	56	14.6512			45.5662	18.0082	7.63984	15.2797	18.5539	38	0
3	5	0	682	3.5176	5028	1467.2	235.91	0.0642264	6.99761	0.00157045	0.477128	0.856087	3327.38	5512.98	0.824994	461.716	99.1177	591.282	7.07802	3789.09	3796.11	392208	8.64558	0.872851	2.14769	4.00768	0.557923	0.13564	121	140	294	101	38	13.564			43.1085	14.8094	5.57185	17.7419	20.5279	38	0
3	6	0	173	2.64162	1483	1338.97	541.571	0.0558738	13.4275	0.00193651	0.308159	0.876979	4209.89	7461.37	0.856669	426.347	92.3913	448.792	11.3261	4636.24	4543.89	438280	8.05887	0.874176	2.04739	3.93916	0.534852	0.116655	59	48	33	15	7	11.6655	10.705	82.5527	19.0751	8.67052	4.04624	34.104	27.7457	38	0
3	7	0	177	2.96045	1371	1349.59	527.969	0.0625989	12.9745	0.00201715	0.382203	0.882925	4275.05	7368.45	0.859879	438.603	98.7143	465.372	11.1823	4713.66	4668.14	472837	8.6104	0.87449	2.12533	4.07226	0.538032	0.129103	55	51	40	18	11	12.9103			22.5989	10.1695	6.21469	31.0734	28.8136	38	0
3	8	0	140	2.87857	1857	1300.65	463.007	0.0415526	12.154	0.00178678	0.217017	0.872226	3786.17	6554.37	0.850908	421.419	91.7116	438.751	10.2133	4207.59	4148.78	398135	7.99958	0.875246	2.06127	3.84725	0.54965	0.0753904	33	43	37	13	6	7.53904			26.4286	9.28571	4.28571	23.5714	30.7143	38	0
3	9	0	805	4.04472	3719	1381.14	276.422	0.0923504	7.20946	0.00134587	0.875504	0.858916	3393.31	5537.54	0.823417	478.69	104.085	566.014	7.56447	3871.99	3901.35	413173	9.07884	0.861834	2.1868	4.15835	0.541816	0.216456	93	156	403	184	63	21.6456	23.6481		50.0621	22.8571	7.82609	11.5528	19.3789	38	0
3	10	0	636	4.02201	2427	1358.05	375.747	0.110883	9.60775	0.00169636	1.05398	0.861885	3294.64	5496.54	0.828519	469.175	99.688	538.028	7.73946	3763.81	3751.58	380392	8.69533	0.874787	2.17642	4.06334	0.551414	0.262052	62	128	322	138	52	26.2052			50.6289	21.6981	8.1761	9.74843	20.1258	38	0
3	11	0	745	4.08725	3226	1337.32	372.85	0.0986385	10.213	0.00176594	0.943893	0.862404	3389.37	5588.42	0.828162	472.549	96.8497	545.255	7.87328	3861.92	3865.39	380810	8.44776	0.869291	2.12617	3.99049	0.550487	0.230936	80	131	398	175	66	23.0936			53.4228	23.4899	8.85906	10.7383	17.5839	38	0
4	3	0	317	3.9653	6992	1619.7	135.882	0.0171306	4.49442	0.00124792	0.179777	0.639764	832.33	1711.08	0.572921	451.372	103.789	366.77	3.64134	1283.7	1294.87	133973	9.05302	0.859387	2.20787	4.10741	0.555572	0.0453375	49	38	172	72	14	4.53375	7.94731		54.2587	22.7129	4.4164	15.4574	11.9874	38	0
4	4	0	387	4.19638	5084	1529.49	241.232	0.0285872	7.25492	0.00166904	0.319434	0.644627	863.159	1762.42	0.578349	456.416	104.748	370.859	3.69645	1319.58	1331.77	138571	9.13672	0.856334	2.19047	4.17233	0.542809	0.0761212	58	36	239	97	30	7.61212			61.7571	25.0646	7.75194	14.9871	9.30233	38	0
4	5	0	451	4.21508	3856	1523.46	308.815	0.038994	8.36048	0.00181172	0.492998	0.633393	839.245	1722.09	0.564338	465.332	107.269	369.813	3.64323	1304.58	1322.15	140643	9.35662	0.854084	2.22968	4.22883	0.542468	0.116961	58	62	265	121	36	11.6961			58.7583	26.8293	7.98226	12.8603	13.7472	38	0
4	6	0	43	2.2093	1683	1431.2	326.677	0.0171495	9.26144	0.00149499	0.0564468	0.714887	1113.46	2244.91	0.672455	381.026	92.6061	298.288	5.1393	1494.49	1482.81	138758	8.0776	0.883295	2.06522	3.83734	0.54969	0.0255496	16	17	7	2	0	2.55496	2.25269	28.3453	16.2791	4.65116	0	37.2093	39.5349	38	0
4	7	0	47	1.93617	1551	1455.8	398.945	0.0195594	10.6976	0.00158646	0.0586718	0.765367	1346.43	2727.72	0.739855	357.697	81.7554	279.128	6.20787	1704.12	1661.36	143849	7.13115	0.884752	1.92665	3.70632	0.548573	0.030303	22	17	4	1	1	3.0303			8.51064	2.12766	2.12766	46.8085	36.1702	38	0
4	8	0	30	2.16667	2558	1342.28	219.902	0.00848977	7.69742	0.00102861	0.0254105	0.763747	1338.69	2683.47	0.731625	351.377	85.588	270.665	6.25119	1690.06	1651.99	138180	7.46545	0.889196	1.96305	3.78501	0.535979	0.0117279	14	9	6	2	0	1.17279			20	6.66667	0	46.6667	30	38	0
4	9	0	597	4.75544	2735	1420.75	372.944	0.053975	9.65814	0.00167313	1.03803	0.637321	848.961	1727.2	0.566255	464.402	109.932	351.969	3.85664	1313.36	1330.51	144100	9.58887	0.856652	2.26077	4.26135	0.545667	0.218282	65	61	407	212	68	21.8282	18.8501		68.1742	35.5109	11.3903	10.8878	10.2178	38	0
4	10	0	456	4.48246	2662	1304.95	353.435	0.0420494	9.47032	0.00155381	0.767844	0.631329	821.44	1700.5	0.563532	462.391	106.92	336.633	3.92219	1283.83	1293.78	137075	9.32613	0.870409	2.27267	4.15958	0.561169	0.1713	39	61	297	130	40	17.13			65.1316	28.5088	8.77193	8.55263	13.3772	38	0
4	11	0	377	4.72149	2143	1380.88	351.623	0.0478473	8.42417	0.00157427	0.830611	0.641404	940.983	1919.3	0.571114	469.395	108.01	362.765	4.0458	1410.38	1415.4	146376	9.42119	0.863324	2.25794	4.20942	0.553369	0.175922	37	39	251	132	40	17.5922			66.5782	35.0133	10.6101	9.81432	10.3448	38	0
5	3	0	527	3.68501	4487	1518.92	262.805	0.0442877	7.6004	0.00159704	0.432806	0.766418	1572.57	2831.44	0.716607	439.284	107.259	412.643	5.1714	2011.85	2027.14	220215	9.35575	0.864779	2.23719	4.23046	0.545813	0.11745	106	82	260	107	23	11.745	10.7423		49.3359	20.3036	4.36433	20.1139	15.5598	38	0
5	4	0	615	3.77886	5795	1511.67	192.539	0.0374259	6.16152	0.00137149	0.401035	0.760238	1506.83	2737	0.709486	438.242	103.624	408.38	5.02304	1945.07	1953.77	205951	9.03867	0.866045	2.20649	4.15602	0.548938	0.106126	109	95	320	124	30	10.6126			52.0325	20.1626	4.87805	17.7236	15.4472	38	0
5	5	0	529	3.75992	5360	1514.85	216.09	0.0365254	6.52183	0.00143875	0.371082	0.759385	1517.14	2764.69	0.708964	443.526	107.392	408.674	5.04944	1960.66	1976.81	216157	9.36727	0.868081	2.24726	4.18923	0.553413	0.098694	105	71	278	106	24	9.8694			52.552	20.0378	4.53686	19.8488	13.4216	38	0
5	6	0	124	3.15323	1386	1292.99	500.651	0.0366067	13.2071	0.00179966	0.282107	0.795862	1949.46	3645.24	0.757043	432.479	96.1399	349.831	7.08909	2381.94	2347.28	230933	8.38584	0.871759	2.09498	4.0138	0.538355	0.0894661	26	31	34	12	5	8.94661	7.53516	70.1444	27.4194	9.67742	4.03226	20.9677	25	38	0
5	7	0	76	2.88158	1326	1329.62	492.501	0.0325538	12.5347	0.00185834	0.165158	0.800871	1977.42	3629.7	0.764719	421.191	98.24	342.852	7.13046	2398.61	2384.26	231745	8.56902	0.870579	2.1293	4.05352	0.542441	0.0573152	17	19	25	5	0	5.73152			32.8947	6.57895	0	22.3684	25	38	0
5	8	0	96	3.1875	1211	1350.72	487.783	0.0366146	13.1222	0.00195234	0.252684	0.810442	2126.94	3864.13	0.775062	417.698	96.0246	341.639	7.81844	2544.64	2510.8	243426	8.37579	0.872264	2.10687	3.99553	0.540681	0.0792733	23	27	30	14	6	7.92733			31.25	14.5833	6.25	23.9583	28.125	38	0
5	9	0	468	4.10256	3523	1437.54	234.6	0.0423021	6.80585	0.00121845	0.54499	0.766476	1607.49	2868.14	0.713117	449.264	107.569	381.453	5.59984	2056.76	2080.39	224245	9.38275	0.861204	2.23115	4.22301	0.544017	0.132841	68	69	260	114	38	13.2841	13.3207		55.5556	24.359	8.11966	14.5299	14.7436	38	0
5	10	0	428	4.0771	2803	1359.52	264.614	0.0465043	7.55583	0.00124959	0.622547	0.764204	1567.44	2843.98	0.713509	450.264	103.639	371.71	5.64533	2017.7	2024.36	210111	9.03994	0.869134	2.22321	4.12788	0.552291	0.152694	53	53	252	101	22	15.2694			58.8785	23.5981	5.14019	12.3832	12.3832	38	0
5	11	0	460	3.91087	4032	1348.21	181.671	0.0356154	5.32515	0.000978865	0.446181	0.775939	1667.46	3028.69	0.730254	440.428	102.879	379.705	5.80674	2107.89	2105.84	219712	8.97363	0.875851	2.23276	4.08785	0.560874	0.114087	73	73	245	104	28	11.4087			53.2609	22.6087	6.08696	15.8696	15.8696	38	0
6	3	0	741	4.33603	5424	1550.39	256.949	0.0503809	7.27636	0.00166914	0.592367	0.73469	1379.48	2535.66	0.677743	462.401	107.796	438.591	4.42673	1841.88	1862.02	203290	9.40257	0.845588	2.19359	4.32757	0.525108	0.136615	90	103	425	201	86	13.6615	12.3399		57.3549	27.1255	11.6059	12.1457	13.9001	38	0
6	4	0	748	4.41979	7010	1540.94	146.954	0.0370643	4.40927	0.00117974	0.471612	0.737256	1374.59	2532.62	0.681275	453.367	104.73	431.661	4.47211	1827.95	1843.3	195641	9.13507	0.853315	2.18814	4.21745	0.536163	0.106705	90	101	443	203	80	10.6705			59.2246	27.139	10.6952	12.0321	13.5027	38	0
6	5	0	726	4.37603	5722	1548.71	227.775	0.0462755	6.63876	0.001537	0.555225	0.734735	1390.63	2546.34	0.677661	462.045	104.193	440.963	4.42063	1852.68	1874.02	196779	9.08826	0.851936	2.15859	4.19339	0.532806	0.126879	83	92	420	187	85	12.6879			57.8512	25.7576	11.708	11.4325	12.6722	38	0
6	6	0	114	2.74561	1719	1308.78	449.346	0.0284659	12.3665	0.00176677	0.182083	0.801131	1927.35	3615.34	0.77159	382.969	88.6906	329.145	7.2306	2310.32	2266.07	201685	7.73608	0.880293	2.02091	3.81839	0.547273	0.0663176	35	32	26	10	5	6.63176	7.18422	58.2192	22.807	8.77193	4.38596	30.7018	28.0702	38	0
6	7	0	112	3.41071	915	1329.74	570.61	0.0508735	13.2066	0.00198652	0.417486	0.81763	2089.22	3845.28	0.78345	396.844	89.8595	376.083	7.17419	2486.06	2452.6	216520	7.83803	0.86441	1.99474	3.88857	0.533073	0.122404	29	28	39	19	9	12.2404			34.8214	16.9643	8.03571	25.8929	25	38	0
6	8	0	101	2.11881	3768	1378.29	172.096	0.0109048	5.85297	0.000959861	0.0567941	0.800884	1798.01	3471.94	0.777114	361.469	82.8002	313.968	7.02927	2159.48	2094.2	178249	7.22228	0.875579	1.9601	3.71302	0.543168	0.0268047	42	34	16	3	1	2.68047			15.8416	2.9703	0.990099	41.5842	33.6634	38	0
6	9	0	786	3.82061	4310	1347.04	204.258	0.0536299	5.84292	0.00102365	0.696752	0.774636	1651.68	2980.57	0.726002	441.318	106.858	385.952	5.7065	2093	2097.65	228516	9.32071	0.849648	2.18236	4.32516	0.52026	0.182367	91	137	377	139	52	18.2367	20.2192		47.9644	17.6845	6.61578	11.5776	17.43	38	0
6	10	0	888	4.34797	3238	1320.31	295.713	0.0810739	7.5281	0.00126321	1.1924	0.768322	1587.17	2885.3	0.7179	445.187	106.928	391.364	5.48197	2032.36	2034.4	220828	9.32686	0.852751	2.18401	4.30627	0.523631	0.274243	86	153	476	220	102	27.4243			53.6036	24.7748	11.4865	9.68468	17.2297	38	0
6	11	0	678	4.24189	4521	1387.25	178.623	0.0452372	4.99292	0.00097098	0.636142	0.763775	1555.38	2822.58	0.712422	445.2	103.408	400.955	5.29026	2000.58	2011.53	210495	9.01978	0.851125	2.14591	4.2216	0.525044	0.149967	76	133	351	169	70	14.9967			51.7699	24.9263	10.3245	11.2094	19.6165	38	0

## Sheet: Fig1a EXP3 200220 PL1
Database Name	Pheinx
Database Location	http://1400l18172/ODA/OdaService.asmx
Evaluation Signature	1d395a65-683c-48db-acb7-8baeb81ee7ed
Plate Name	joanna 200220 plate 1 retake
Measurement	Measurement 1
Evaluation	Evaluation1
[Data]
Row	Column	Timepoint	infected cell - Number of Objects	infected cell - Number of toxo Selected- per Cell - Mean per Well	Nuclei - Number of Objects	Nuclei - Intensity Nucleus HOECHST 33342 Mean - Mean per Well	Nuclei - Total Spot Area - Mean per Well	Nuclei - Relative Spot Intensity - Mean per Well	Nuclei - Number of Spots - Mean per Well	Nuclei - Number of Spots per Area of Cytoplasm - Mean per Well	Nuclei - Number of toxo Selected- per Cell - Mean per Well	Nuclei - Relative Spot Intensity- Mean per Cell - Mean per Well	Nuclei - Corrected Spot Intensity- Mean per Cell - Mean per Well	Nuclei - Uncorrected Spot Peak Intensity- Mean per Cell - Mean per Well	Nuclei - Spot Contrast- Mean per Cell - Mean per Well	Nuclei - Spot Background Intensity- Mean per Cell - Mean per Well	Nuclei - Spot Area [px¬≤]- Mean per Cell - Mean per Well	Nuclei - Region Intensity- Mean per Cell - Mean per Well	Nuclei - Spot to Region Intensity- Mean per Cell - Mean per Well	Nuclei - Intensity toxo Mean- Mean per Cell - Mean per Well	Nuclei - Intensity toxo Median- Mean per Cell - Mean per Well	Nuclei - Intensity toxo Sum- Mean per Cell - Mean per Well	Nuclei - toxo Area [¬µm¬≤]- Mean per Cell - Mean per Well	Nuclei - toxo Roundness- Mean per Cell - Mean per Well	Nuclei - toxo Width [¬µm]- Mean per Cell - Mean per Well	Nuclei - toxo Length [¬µm]- Mean per Cell - Mean per Well	Nuclei - toxo Ratio Width to Length- Mean per Cell - Mean per Well	Nuclei - infected cell - Mean per Well	infected 1 toxo per cell - Number of Objects	infected 2 toxo per cell - Number of Objects	infected>=4 per cell - Number of Objects	infected>=6 toxo per cell - Number of Objects	infected>=8 toxo per cell - Number of Objects	percent infected cell			Percent >4 toxo per cell	percent>6 toxo per cell	percent>8 toxo per vac	percent 1 toxo only	percent 2 toxo only	Number of Analyzed Fields	Time [s]	Compound	Concentration	Cell Type	Cell Count
2	2	0	452	2.52212	6735	2241.73	41.354	0.0239017	1.02123	0.000256109	0.169265	0.836013	2702.58	4693.87	0.807491	404.029	99.8389	439.393	7.65821	3106.61	3106.65	317795	8.71107	0.876701	2.17011	3.9824	0.56181	0.0671121	132	138	95	24	6	6.71121	6.71454		21.0177	5.30973	1.32743	29.2035	30.531	38	0
2	3	0	402	2.29353	7212	2240.48	33.7636	0.0182738	0.862035	0.000220994	0.127842	0.825057	2517.5	4423.62	0.797034	398.462	102.186	403.615	7.63345	2915.96	2911.25	299863	8.91586	0.876218	2.19548	4.02275	0.559738	0.0557404	147	111	70	12	2	5.57404			17.4129	2.98507	0.497512	36.5672	27.6119	38	0
2	4	0	597	2.45059	7597	2288.24	42.9114	0.0265212	1.00856	0.000263056	0.192576	0.827347	2569.34	4435.52	0.798365	395.82	98.5157	421.815	7.53341	2965.16	2970.02	291152	8.59561	0.88282	2.17494	3.93446	0.567399	0.0785837	196	162	125	27	7	7.85837			20.938	4.52261	1.17253	32.8308	27.1357	38	0
2	5	0	151	1.56954	5465	2128.94	58.8633	0.009232	1.7828	0.000320643	0.0433669	0.849816	3230.83	5835.86	0.834583	367.288	91.7776	337.003	10.9674	3598.12	3540.01	357210	8.00771	0.893699	2.10483	3.82093	0.569818	0.0276304	94	37	7	1	0	2.76304	2.96655	44.1809	4.63576	0.662252	0	62.2517	24.5033	38	0
2	6	0	205	1.43902	6488	2101.63	49.7466	0.00919016	1.45669	0.000277695	0.0454686	0.841905	3025.87	5417.92	0.824279	369.74	92.949	323.769	10.4159	3395.6	3351.64	315664	8.10991	0.898951	2.14146	3.86729	0.57051	0.0315968	140	46	5	0	0	3.15968			2.43902	0	0	68.2927	22.439	38	0
2	7	0	169	1.61538	5677	2125.28	57.1201	0.00992126	1.68487	0.000302769	0.0480888	0.848485	3401.11	6024.24	0.833954	367.174	87.5779	346.599	10.8698	3768.28	3726.75	340050	7.64128	0.900347	2.07276	3.6743	0.58938	0.0297692	99	48	7	1	0	2.97692			4.14201	0.591716	0	58.5799	28.4024	38	0
2	8	0	329	2.30395	7327	2064.21	34.6136	0.0155641	0.842637	0.000192253	0.103453	0.825267	2699.97	4594.89	0.795791	410.815	102.12	435.104	7.63894	3110.78	3129.83	319736	8.9101	0.87386	2.20797	4.0138	0.562864	0.0449024	107	101	56	6	1	4.49024	5.62944		17.0213	1.82371	0.303951	32.5228	30.6991	38	0
2	9	0	385	2.36104	7118	2083.91	38.8757	0.0174648	0.925822	0.000209304	0.127704	0.821697	2606.19	4516.39	0.793533	402.71	100.193	399.527	7.86999	3008.9	3019.03	307478	8.74199	0.879412	2.18957	3.95148	0.566529	0.0540882	138	95	80	15	2	5.40882			20.7792	3.8961	0.519481	35.8442	24.6753	38	0
2	10	0	507	2.23471	7254	2049.43	37.0096	0.0232164	0.851944	0.000196987	0.15619	0.838705	2793.64	4847.76	0.812246	395.102	101.181	419.117	8.18765	3188.74	3195.18	321342	8.82816	0.882356	2.20698	4.01072	0.562211	0.0698925	178	150	82	7	1	6.98925			16.1736	1.38067	0.197239	35.1085	29.5858	38	0
3	2	0	884	3.40271	6931	2219.85	62.5435	0.0272657	0.808108	0.000192875	0.433992	0.669596	758.824	1555.7	0.613584	363.331	106.431	302.662	3.89384	1122.16	1132.34	119650	9.28625	0.866338	2.23738	4.21546	0.544537	0.127543	228	178	327	149	60	12.7543	10.4109		36.991	16.8552	6.78733	25.7919	20.1357	38	0
3	3	0	785	3.26369	7786	2229.52	50.2579	0.0230428	0.638839	0.000166577	0.329052	0.663165	747.59	1536.92	0.606101	366.266	106.575	308.097	3.80535	1113.86	1126.09	119200	9.29876	0.856744	2.22445	4.21049	0.540767	0.100822	215	147	293	118	42	10.0822			37.3248	15.0318	5.35032	27.3885	18.7261	38	0
3	4	0	635	3.16535	7563	2238.11	41.7155	0.0192341	0.538014	0.000146227	0.265768	0.658532	728.286	1511.28	0.601114	367.327	105.477	304.233	3.7774	1095.61	1106.08	116378	9.20303	0.859332	2.21264	4.19599	0.540144	0.0839614	178	107	251	89	19	8.39614			39.5276	14.0157	2.99213	28.0315	16.8504	38	0
3	5	0	89	1.52809	7002	2034.15	4.2645	0.00184868	0.12982	3.04677e-05	0.019423	0.744546	1014.82	2060.25	0.716231	308.381	97.0285	250.804	5.28132	1323.2	1307.44	128430	8.46585	0.888812	2.16464	3.96535	0.559027	0.0127107	56	23	3	0	0	1.27107	1.24354	11.9447	3.37079	0	0	62.9213	25.8427	38	0
3	6	0	73	1.41096	7121	2092.03	3.40795	0.00133137	0.104761	2.28069e-05	0.0144643	0.749987	1011.38	2040.01	0.717676	304.586	95.9543	240.686	5.49858	1315.97	1301.7	124401	8.37213	0.887324	2.12872	4.02014	0.547522	0.0102514	49	19	1	0	0	1.02514			1.36986	0	0	67.1233	26.0274	38	0
3	7	0	105	1.61905	7320	2091.19	4.14727	0.00219524	0.116667	2.73245e-05	0.023224	0.751908	1030.76	2053.46	0.720928	300.488	92.9784	255.834	5.29907	1331.25	1320.75	122423	8.11248	0.894545	2.12749	3.83645	0.567069	0.0143443	63	27	4	1	0	1.43443			3.80952	0.952381	0	60	25.7143	38	0
3	8	0	800	2.77625	7292	2143.34	46.576	0.0208283	0.612315	0.00014205	0.30458	0.686678	797.185	1619.64	0.635853	346.718	107.498	282.784	4.18927	1143.9	1152.34	123098	9.37934	0.869628	2.25256	4.24542	0.542081	0.109709	278	162	226	72	25	10.9709	11.7226		28.25	9	3.125	34.75	20.25	38	0
3	9	0	854	2.77752	7489	2084.14	47.2697	0.0215523	0.63867	0.000155533	0.316731	0.681098	780.947	1599.8	0.629557	349.613	101.904	287.086	4.0978	1130.56	1137.74	115618	8.89128	0.865975	2.1814	4.12598	0.541706	0.114034	310	167	260	82	20	11.4034			30.445	9.60187	2.34192	36.2998	19.555	38	0
3	10	0	894	2.78859	6988	2007.81	54.9986	0.0228684	0.741557	0.000171513	0.356754	0.677765	776.87	1585	0.624752	352.894	107.159	287.205	4.10208	1129.76	1139.29	120688	9.34971	0.873646	2.262	4.20398	0.548835	0.127934	321	175	251	95	25	12.7934			28.0761	10.6264	2.79642	35.906	19.5749	38	0
4	2	0	2486	4.53902	7392	2215.94	162.482	0.100186	1.98187	0.000480541	1.52652	0.746573	1234.58	2274.79	0.693801	386.089	99.4664	393.454	4.50111	1620.67	1638.07	163798	8.67857	0.853801	2.11422	4.09441	0.532491	0.33631	420	410	1361	757	374	33.631	30.07		54.7466	30.4505	15.0442	16.8946	16.4924	38	0
4	3	0	2102	4.2588	7514	2187.17	133.023	0.0818478	1.64533	0.000405455	1.19138	0.743475	1224.96	2258.92	0.690949	389.689	99.7541	382.604	4.58489	1614.65	1634.72	164565	8.70366	0.854433	2.12957	4.07241	0.538873	0.279744	374	331	1089	586	263	27.9744			51.8078	27.8782	12.5119	17.7926	15.7469	38	0
4	4	0	2341	4.19137	8184	2268.24	132.31	0.0868569	1.63746	0.000450033	1.19892	0.743908	1207.11	2231.1	0.691536	384.03	98.6276	392.239	4.43205	1591.14	1609.46	159961	8.60538	0.855212	2.10912	4.05575	0.537085	0.286046	478	361	1190	622	285	28.6046			50.833	26.5698	12.1743	20.4186	15.4208	38	0
4	5	0	791	2.30973	6135	2100.02	33.2781	0.0245337	0.610106	0.000123462	0.2978	0.79948	1467.14	2759.29	0.767948	325.126	89.9236	282.719	6.49454	1792.27	1777.41	164570	7.84594	0.877904	2.05294	3.81009	0.554273	0.128932	273	262	140	30	8	12.8932	12.7431	42.3782	17.6991	3.79267	1.01138	34.5133	33.1226	38	0
4	6	0	782	2.23785	6688	2105.16	30.9716	0.0235095	0.548295	0.000114172	0.261663	0.80142	1542.08	2902.39	0.771415	327.786	91.8379	292.875	6.56927	1869.87	1852.87	173711	8.01297	0.877442	2.06548	3.90294	0.545077	0.116926	279	250	113	26	5	11.6926			14.4501	3.32481	0.639386	35.6777	31.9693	38	0
4	7	0	865	2.34335	6340	2160.31	37.0009	0.0277235	0.664196	0.000131217	0.319716	0.803932	1537.47	2870.12	0.773268	325.91	92.545	286.117	6.68324	1863.38	1850.29	174554	8.07466	0.87438	2.07629	3.93684	0.544989	0.136435	315	258	152	40	12	13.6435			17.5723	4.62428	1.38728	36.4162	29.8266	38	0
4	8	0	2242	4.05308	7801	2109.16	128.515	0.0801449	1.56659	0.000374599	1.16485	0.748533	1247.11	2327.43	0.700258	382.645	97.5956	370.916	4.73904	1629.75	1639.37	161574	8.51533	0.855786	2.097	4.06803	0.530849	0.287399	409	388	1084	536	250	28.7399	27.3699		48.3497	23.9072	11.1508	18.2426	17.306	38	0
4	9	0	2368	4.09924	7346	2090.81	143.908	0.0894778	1.75388	0.000406257	1.3214	0.750829	1262.53	2349.6	0.703142	381.693	98.3806	373.951	4.75793	1644.23	1656.29	164466	8.58382	0.858918	2.11212	4.06177	0.535428	0.322352	456	395	1156	591	276	32.2352			48.8176	24.9578	11.6554	19.2568	16.6807	38	0
4	10	0	1632	3.50061	7722	2122.38	86.1724	0.0569217	1.03522	0.000252051	0.739834	0.751094	1242.08	2310.97	0.703469	375.58	102.15	352.765	4.89855	1617.66	1631.32	168502	8.91269	0.859235	2.15149	4.13622	0.533593	0.211344	368	331	674	286	100	21.1344			41.299	17.5245	6.12745	22.549	20.2819	38	0
5	2	0	745	3.21342	7096	2289.65	38.4057	0.0273159	0.527198	0.00012838	0.337373	0.761454	1327.06	2434.04	0.713456	379.858	101.607	344.833	5.31704	1706.92	1724.69	177476	8.86532	0.86749	2.17931	4.07989	0.550668	0.104989	185	154	289	97	25	10.4989	13.0613		38.7919	13.0201	3.3557	24.8322	20.6711	38	0
5	3	0	1237	3.27809	7720	2288.37	62.2433	0.0434864	0.840026	0.000206192	0.525259	0.758544	1322.28	2437.66	0.711755	380.774	102.314	357.506	5.1154	1703.06	1719.03	177994	8.92706	0.868994	2.19393	4.07152	0.553911	0.160233	324	223	485	168	60	16.0233			39.2078	13.5812	4.85044	26.1924	18.0275	38	0
5	4	0	939	3.39084	7416	2261.6	49.8478	0.0337569	0.684061	0.000164242	0.429342	0.757974	1312.71	2415.01	0.711544	377.046	99.5703	345.907	5.24922	1689.76	1704.23	172549	8.68763	0.866498	2.15557	4.01186	0.552679	0.126618	237	154	386	156	44	12.6618			41.1076	16.6134	4.68584	25.2396	16.4004	38	0
5	5	0	433	1.77367	6194	2119.4	17.0551	0.0130027	0.33484	6.45546e-05	0.123991	0.817601	1768.19	3282.15	0.791606	330.064	93.9338	278.465	7.64542	2098.26	2076.53	197324	8.19584	0.887308	2.11688	3.91804	0.554147	0.0699064	211	144	20	3	1	6.99064	5.9945	45.895	4.61894	0.692841	0.230947	48.7298	33.2564	38	0
5	6	0	328	1.79573	6467	2097.12	12.5885	0.0095082	0.25174	5.35048e-05	0.0910778	0.813448	1778	3322.23	0.788	331.935	91.0994	275.423	7.73757	2109.93	2085.24	190748	7.94853	0.887633	2.09481	3.85847	0.55861	0.050719	162	105	21	2	0	5.0719			6.40244	0.609756	0	49.3902	32.0122	38	0
5	7	0	379	1.66755	6401	2184.56	13.4735	0.0104927	0.270739	5.14817e-05	0.0987346	0.820335	1797.01	3362.84	0.795745	327.671	95.9409	269.761	7.92949	2124.68	2098.02	208036	8.37096	0.892046	2.1572	3.96411	0.559474	0.0592095	209	115	19	3	0	5.92095			5.01319	0.791557	0	55.1451	30.343	38	0
5	8	0	924	2.86797	7261	2109.09	46.2792	0.0304243	0.61727	0.000136933	0.364964	0.760626	1343.41	2483.52	0.716761	375.771	101.787	325.637	5.56262	1719.18	1730.53	179476	8.88104	0.868752	2.18835	4.06201	0.552007	0.127255	273	195	284	80	26	12.7255	11.9504		30.7359	8.65801	2.81385	29.5455	21.1039	38	0
5	9	0	861	2.83391	7619	2100.76	39.7815	0.0277727	0.523166	0.000122837	0.320252	0.762048	1328.26	2462.3	0.7183	372.264	103.369	327.725	5.47381	1700.52	1712.63	178756	9.01903	0.870751	2.21372	4.07802	0.554357	0.113007	245	210	255	75	19	11.3007			29.6167	8.7108	2.20674	28.4553	24.3902	38	0
5	10	0	832	3.02404	7036	2024.5	42.2399	0.0268888	0.560546	0.000122766	0.35759	0.747082	1219.96	2295.82	0.701211	374.047	98.2151	316.834	5.23727	1594.01	1596.59	158874	8.56939	0.874514	2.15974	3.99872	0.552874	0.118249	203	190	279	94	20	11.8249			33.5337	11.2981	2.40385	24.399	22.8365	38	0
6	2	0	159	2.49686	1502	159.893	25.2843	0.0227578	0.677763	0.000213949	0.264314	0.784487	1408.18	2508.3	0.736546	340.44	69.4163	273.046	6.88916	1748.62	1769.65	124076	6.05666	0.800728	1.68737	3.39411	0.518714	0.105859	72	38	33	14	6	10.5859	12.0849		20.7547	8.80503	3.77358	45.283	23.8994	38	0
6	3	0	287	2.56794	2188	159.529	37.5539	0.0316722	1.0096	0.000301174	0.336837	0.792129	1483.07	2635.84	0.743561	354.893	73.6701	297.84	6.87421	1837.97	1853.91	136085	6.42781	0.807657	1.75354	3.49664	0.52087	0.13117	105	74	66	23	8	13.117			22.9965	8.01394	2.78746	36.5854	25.784	38	0
6	4	0	273	2.60806	2175	159.699	35.4883	0.0285284	0.895172	0.000268069	0.327356	0.778882	1389.92	2447.7	0.728882	352.472	72.1278	285.128	6.60232	1742.39	1765.45	127233	6.29323	0.802707	1.72578	3.46453	0.518574	0.125517	98	66	59	21	11	12.5517			21.6117	7.69231	4.0293	35.8974	24.1758	38	0
6	5	0	61	1.67213	1658	161.362	26.9469	0.00863443	1.58203	0.000383931	0.0615199	0.840632	2053.38	3741.88	0.818576	297.018	64.061	237.526	10.2569	2350.4	2338.99	152038	5.5894	0.848616	1.71365	3.17794	0.5549	0.0367913	37	18	2	2	1	3.67913	3.92646		3.27869	3.27869	1.63934	60.6557	29.5082	38	0
6	6	0	64	1.71875	1874	161	18.5662	0.00891772	1.09872	0.000268017	0.058698	0.851065	2221.77	3935.81	0.824995	307.161	64.5169	280.439	9.86195	2528.93	2519.37	168129	5.62918	0.81917	1.69098	3.22984	0.543958	0.0341515	33	20	2	1	0	3.41515			3.125	1.5625	0	51.5625	31.25	38	0
6	7	0	61	1.59016	1302	161.401	27.7335	0.0112331	1.48694	0.000356553	0.0745008	0.84452	2093.96	3792.67	0.823181	293.989	67.7418	252.176	10.0914	2387.95	2361.61	166872	5.91055	0.82509	1.72139	3.3478	0.532227	0.046851	35	18	2	0	0	4.6851			3.27869	0	0	57.377	29.5082	38	0
6	8	0	145	2.75172	1353	160.329	35.3156	0.0264873	1.03252	0.000268362	0.2949	0.793987	1558.5	2789.04	0.751487	350.811	72.5585	291.301	7.22477	1909.31	1922.64	138656	6.33082	0.814408	1.74802	3.46147	0.517876	0.107169	42	33	38	12	2	10.7169	10.044		26.2069	8.27586	1.37931	28.9655	22.7586	38	0
6	9	0	106	2.35849	999	159.321	30.97	0.024627	1.00701	0.000256721	0.25025	0.792666	1474.42	2708.42	0.750134	340.005	72.1135	284.237	7.04804	1814.42	1808.82	132362	6.29199	0.818066	1.73093	3.39022	0.523754	0.106106	48	22	21	8	2	10.6106			19.8113	7.54717	1.88679	45.283	20.7547	38	0
6	10	0	109	2.36697	1238	159.784	22.9992	0.0185175	0.726979	0.000200733	0.208401	0.804562	1565.55	2829.03	0.762616	333.91	66.7371	257.197	7.9149	1899.46	1903.84	126427	5.82289	0.815333	1.68983	3.29234	0.533376	0.0880452	46	23	20	5	3	8.80452			18.3486	4.58716	2.75229	42.2018	21.1009	38	0

## Sheet: Fig1a EXP4 200220 PL2
Database Name	Pheinx
Database Location	http://1400l18172/ODA/OdaService.asmx
Evaluation Signature	355bea45-9fd1-4ecd-b9ee-03b7d328f46d
Plate Name	joanna 200220 plate 2 retake
Measurement	Measurement 1
Evaluation	Evaluation1
[Data]
Row	Column	Timepoint	infected cell - Number of Objects	infected cell - Number of toxo Selected- per Cell - Mean per Well	Nuclei - Number of Objects	Nuclei - Intensity Nucleus HOECHST 33342 Mean - Mean per Well	Nuclei - Total Spot Area - Mean per Well	Nuclei - Relative Spot Intensity - Mean per Well	Nuclei - Number of Spots - Mean per Well	Nuclei - Number of Spots per Area of Cytoplasm - Mean per Well	Nuclei - Number of toxo Selected- per Cell - Mean per Well	Nuclei - Relative Spot Intensity- Mean per Cell - Mean per Well	Nuclei - Corrected Spot Intensity- Mean per Cell - Mean per Well	Nuclei - Uncorrected Spot Peak Intensity- Mean per Cell - Mean per Well	Nuclei - Spot Contrast- Mean per Cell - Mean per Well	Nuclei - Spot Background Intensity- Mean per Cell - Mean per Well	Nuclei - Spot Area [px¬≤]- Mean per Cell - Mean per Well	Nuclei - Region Intensity- Mean per Cell - Mean per Well	Nuclei - Spot to Region Intensity- Mean per Cell - Mean per Well	Nuclei - Intensity toxo Mean- Mean per Cell - Mean per Well	Nuclei - Intensity toxo Median- Mean per Cell - Mean per Well	Nuclei - Intensity toxo Sum- Mean per Cell - Mean per Well	Nuclei - toxo Area [¬µm¬≤]- Mean per Cell - Mean per Well	Nuclei - toxo Roundness- Mean per Cell - Mean per Well	Nuclei - toxo Width [¬µm]- Mean per Cell - Mean per Well	Nuclei - toxo Length [¬µm]- Mean per Cell - Mean per Well	Nuclei - toxo Ratio Width to Length- Mean per Cell - Mean per Well	Nuclei - infected cell - Mean per Well	infected 1 toxo per cell - Number of Objects	infected 2 toxo per cell - Number of Objects	infected>=4 per cell - Number of Objects	infected>=6 toxo per cell - Number of Objects	infected>=8 toxo per cell - Number of Objects	percent infected cell			Percent >4 toxo per cell	percent>6 toxo per cell	percent>8 toxo per vac	percent 1 toxo only	percent 2 toxo only	Number of Analyzed Fields	Time [s]	Compound	Concentration	Cell Type	Cell Count
2	2	0	322	3.03727	6077	2034.72	21.5519	0.0182306	0.508475	0.0001113	0.160935	0.836219	2673.58	4524.37	0.810608	397.211	93.2341	453.056	7.40574	3070.79	3082.3	307110	8.13479	0.878943	2.07452	3.78634	0.57334	0.0529867	97	73	97	39	10	5.29867	7.05499		30.1242	12.1118	3.10559	30.1242	22.6708	38	0
2	3	0	323	2.81734	4686	1999.78	40.6897	0.024519	1.17243	0.000217577	0.194195	0.854994	3026.84	5037.92	0.828009	396.049	96.7169	463.626	8.14509	3422.89	3452.01	353176	8.43866	0.872417	2.08898	3.90414	0.562632	0.0689287	93	78	89	29	9	6.89287			27.5542	8.97833	2.78638	28.7926	24.1486	38	0
2	4	0	500	3.004	5572	2064.55	37.0698	0.0308903	0.921034	0.000196754	0.269562	0.836984	2703.01	4562.94	0.813154	389.104	88.8074	459.825	7.29104	3092.12	3108.93	301912	7.74855	0.880015	2.02931	3.65915	0.579996	0.0897344	165	104	151	59	22	8.97344			30.2	11.8	4.4	33	20.8	38	0
2	5	0	157	3.10828	2991	1978.51	44.1371	0.0166756	1.40288	0.000225561	0.163156	0.870309	3567.57	6048	0.849376	386.237	84.7658	423.508	10.7697	3953.81	3939.9	354211	7.39591	0.878656	1.98679	3.66624	0.560707	0.0524908	54	34	43	21	10	5.24908	5.23228	74.1641	27.3885	13.3758	6.36943	34.3949	21.6561	38	0
2	6	0	191	2.94764	3106	1920.37	52.1645	0.0200716	1.64617	0.000254104	0.181262	0.877065	3964.5	6762.24	0.857594	379.935	84.3856	403.197	11.8456	4344.43	4323.98	383485	7.36275	0.876474	1.96496	3.67575	0.555693	0.0614939	61	51	43	18	12	6.14939			22.5131	9.42408	6.28272	31.9372	26.7016	38	0
2	7	0	170	3.03529	3955	1930.94	27.0458	0.0130953	0.844753	0.000131081	0.130468	0.858114	3228.04	5535.18	0.835932	373.999	84.0078	380.95	10.1459	3602.04	3581.68	306207	7.32978	0.887296	1.98885	3.65465	0.563964	0.0429836	58	50	36	15	10	4.29836			21.1765	8.82353	5.88235	34.1176	29.4118	38	0
2	8	0	303	3.27723	5805	1876.68	20.0202	0.00972678	0.439793	9.06237e-05	0.171059	0.730923	1031.61	2118.95	0.697025	335.284	75.7468	272.229	5.18786	1366.89	1325.78	104378	6.609	0.904963	1.96238	3.29338	0.609357	0.0521964	83	58	104	39	15	5.21964	7.00402		34.3234	12.8713	4.9505	27.3927	19.1419	38	0
2	9	0	320	3.325	4258	1910.35	46.1536	0.0245793	1.31752	0.000223508	0.249883	0.848014	2847.23	4797.96	0.822087	389.456	88.8896	408.983	8.646	3236.69	3256.11	312048	7.75573	0.874796	2.02095	3.68224	0.571749	0.0751527	80	59	127	47	14	7.51527			39.6875	14.6875	4.375	25	18.4375	38	0
2	10	0	356	3.30056	4301	1937.77	56.8361	0.0265269	1.80051	0.00029972	0.273192	0.840284	2650.28	4564.56	0.815329	378.985	83.2798	398.788	8.29336	3029.27	3023.39	273403	7.26626	0.886333	1.9782	3.53708	0.582461	0.0827714	102	65	123	57	23	8.27714			34.5506	16.0112	6.46067	28.6517	18.2584	38	0
3	2	0	653	4.13936	5059	1917.57	76.3453	0.0268262	1.23641	0.000252683	0.534295	0.648878	708.468	1524.91	0.596964	375.501	96.2018	296.282	3.83137	1083.97	1072.92	103432	8.39372	0.87686	2.16978	3.96843	0.561042	0.129077	151	119	304	174	90	12.9077	13.0385		46.5544	26.6462	13.7825	23.124	18.2236	38	0
3	3	0	782	4.09079	5314	1905.6	87.8542	0.0308877	1.36376	0.000283196	0.601995	0.642529	696.533	1496.82	0.588411	379.734	96.8083	304.134	3.71388	1076.27	1068.59	103293	8.44664	0.868587	2.16623	3.99596	0.55516	0.147158	204	117	376	214	100	14.7158			48.0818	27.3657	12.7877	26.087	14.9616	38	0
3	4	0	637	4.05024	5543	2002.06	62.5971	0.0236152	0.969331	0.000202367	0.465452	0.645615	708.743	1503.26	0.589141	379.625	93.5393	289.273	3.92225	1088.37	1083.6	101619	8.16141	0.86774	2.12112	3.91864	0.556887	0.11492	147	97	318	172	80	11.492			49.9215	27.0016	12.5589	23.0769	15.2276	38	0
3	5	0	149	3.00671	2314	1901.25	49.3963	0.0106525	1.61279	0.000254097	0.193604	0.724724	1019.79	2069.72	0.687874	337.578	89.697	268.876	5.25894	1357.37	1329.76	117473	7.82617	0.882259	2.04622	3.85385	0.548504	0.0643907	44	52	33	18	11	6.43907	6.24331	47.8837	22.1477	12.0805	7.38255	29.5302	34.8993	38	0
3	6	0	187	2.56684	2521	1857.73	35.8893	0.00953997	1.0119	0.000144487	0.190401	0.729973	993.836	2021.79	0.695532	331.852	91.5124	252.26	5.46939	1325.69	1302.89	120087	7.98457	0.87638	2.07595	3.93862	0.541762	0.0741769	66	60	30	14	11	7.41769			16.0428	7.48663	5.88235	35.2941	32.0856	38	0
3	7	0	171	2.14035	3509	1921.75	17.6062	0.00529097	0.517241	7.33927e-05	0.104303	0.740211	1000.87	2064.41	0.709985	313.969	87.5877	231.359	5.74627	1314.83	1281.76	115267	7.64213	0.880797	2.03162	3.84131	0.545358	0.0487318	68	66	23	7	2	4.87318			13.4503	4.09357	1.16959	39.7661	38.5965	38	0
3	8	0	643	3.8056	4607	1803.63	79.6095	0.0260964	1.2392	0.000218387	0.531148	0.661531	734.961	1553.73	0.610872	361.996	96.3892	277.856	4.14701	1096.96	1084.8	105372	8.41008	0.889131	2.21329	3.8941	0.582349	0.13957	192	93	285	162	76	13.957	18.9737		44.3235	25.1944	11.8196	29.86	14.4635	38	0
3	9	0	673	4.61961	3285	1798.98	125.839	0.0374093	1.9172	0.000301156	0.946423	0.648898	738.283	1558.21	0.59198	385.565	98.1177	287.256	4.11352	1123.85	1117.49	109793	8.56089	0.874045	2.20043	3.9565	0.568273	0.204871	125	108	379	247	110	20.4871			56.315	36.7013	16.3447	18.5736	16.0475	38	0
3	10	0	686	4.95044	3052	1815.49	138.918	0.0425167	2.01573	0.000315246	1.11271	0.660043	750.246	1564.81	0.604624	374.341	98.9014	289.761	4.11001	1124.59	1117.6	111088	8.62927	0.871906	2.19617	4.02843	0.555889	0.224771	143	92	383	259	126	22.4771			55.8309	37.7551	18.3673	20.8455	13.4111	38	0
4	2	0	1054	4.67457	4143	1904.35	130.332	0.0610247	2.20299	0.000405411	1.18923	0.729159	1125.71	2158.88	0.679787	392.153	95.5918	344.639	4.72691	1517.86	1513.66	149212	8.3405	0.870211	2.12053	3.93676	0.55898	0.254405	217	151	574	387	178	25.4405	21.4592		54.4592	36.7173	16.888	20.5882	14.3264	38	0
4	3	0	947	4.38332	4872	1892.42	97.3196	0.0464196	1.69232	0.000325785	0.852011	0.721058	1079.26	2093.24	0.671967	392.659	95.8754	339.13	4.62479	1471.92	1466.38	144074	8.36525	0.870275	2.13846	3.93604	0.562137	0.194376	237	115	500	297	134	19.4376			52.7983	31.3622	14.1499	25.0264	12.1436	38	0
4	4	0	1270	4.40079	6513	1948.99	89.6774	0.0471186	1.45386	0.000330007	0.85813	0.71006	1009.93	2007.58	0.662178	388.156	91.6053	347.796	4.32516	1398.09	1381.59	128957	7.99267	0.877088	2.11334	3.82721	0.568879	0.194995	302	172	688	413	202	19.4995			54.1732	32.5197	15.9055	23.7795	13.5433	38	0
4	5	0	311	3.02572	2157	1891.4	68.2967	0.0256447	1.89476	0.000256827	0.436254	0.785913	1446.28	2775.87	0.752853	341.876	89.2885	278.992	6.6615	1788.15	1745.07	161647	7.79053	0.872802	2.03738	3.89661	0.537394	0.144182	76	95	79	33	17	14.4182	12.4846	58.1784	25.4019	10.6109	5.46624	24.4373	30.5466	38	0
4	6	0	385	3.62857	2855	1938.44	62.9944	0.0267623	1.54291	0.000205388	0.489317	0.809721	1670.05	3150.88	0.780843	334.711	88.6288	301.058	7.22764	2004.76	1962.88	179071	7.73297	0.878442	2.03739	3.83894	0.548527	0.134851	113	106	91	45	27	13.4851			23.6364	11.6883	7.01299	29.3506	27.5325	38	0
4	7	0	340	2.62647	3560	1923.82	32.0938	0.016822	0.745506	0.000106912	0.250843	0.798271	1480.75	2837.04	0.769205	330.182	91.1636	268.285	7.04489	1810.93	1765.52	166759	7.95413	0.873288	2.0638	3.9038	0.543765	0.0955056	112	95	69	26	10	9.55056			20.2941	7.64706	2.94118	32.9412	27.9412	38	0
4	8	0	926	3.91037	5262	1887.74	71.9513	0.0428134	1.07735	0.000198728	0.688141	0.755596	1320.03	2476.62	0.709845	390.405	96.3935	327.555	5.51244	1710.44	1703.75	168865	8.41044	0.853038	2.08018	4.071	0.527624	0.175979	154	161	450	196	77	17.5979	23.377		48.5961	21.1663	8.31533	16.6307	17.3866	38	0
4	9	0	864	4.99653	2775	1826.15	163.695	0.0771137	2.51423	0.000366206	1.55568	0.762715	1365.14	2521.59	0.714436	390.322	96.4725	330.135	5.7041	1755.46	1745.51	171228	8.41734	0.86016	2.11013	4.04288	0.538102	0.311351	121	96	539	313	161	31.1351			62.3843	36.2269	18.6343	14.0046	11.1111	38	0
4	10	0	747	4.6921	3491	1847.41	107.922	0.0551036	1.66342	0.000277063	1.00401	0.748461	1306.84	2406.42	0.695779	401.813	97.488	340.974	5.35081	1708.65	1712.19	169527	8.50595	0.850505	2.10233	4.07114	0.533198	0.213979	97	94	448	242	99	21.3979			59.9732	32.3963	13.253	12.9853	12.5837	38	0
5	2	0	749	2.5781	4102	1982.55	79.7823	0.0287511	2.24451	0.0003741	0.470746	0.744154	1088.83	2185.34	0.711837	334.639	94.7513	269.924	5.42781	1423.47	1404.9	138772	8.26717	0.902504	2.20554	3.72428	0.612212	0.182594	329	173	174	76	34	18.2594	13.3338		23.231	10.1469	4.53939	43.9252	23.0975	38	0
5	3	0	638	2.41379	5853	1974.42	36.6667	0.0180563	0.930976	0.000189997	0.263113	0.740615	1039.13	2149.62	0.712162	329.464	92.7398	269.907	5.23688	1368.59	1339.53	128782	8.09166	0.914924	2.22064	3.64563	0.629283	0.109004	337	116	134	66	19	10.9004			21.0031	10.3448	2.97806	52.8213	18.1818	38	0
5	4	0	657	2.36377	6060	2041.54	35.3305	0.0184904	0.942244	0.000193732	0.256271	0.743365	1049.04	2149.9	0.715154	326.058	89.6627	270.533	5.24445	1375.1	1346.44	127813	7.82317	0.912679	2.15704	3.57051	0.622904	0.108416	327	134	131	53	22	10.8416			19.9391	8.06697	3.34855	49.7717	20.3957	38	0
5	5	0	182	2.30769	2792	1921.18	50.015	0.0110087	1.75788	0.000228531	0.15043	0.783495	1501.29	2893.3	0.754062	342.969	94.9105	266.052	7.00653	1844.26	1812.3	177466	8.28106	0.894554	2.19376	3.82724	0.585781	0.0651862	83	59	22	12	8	6.51862	4.97748	37.3298	12.0879	6.59341	4.3956	45.6044	32.4176	38	0
5	6	0	147	2.18367	3056	1899.35	29.806	0.00808237	1.07559	0.000136787	0.105039	0.798077	1689.42	3215.38	0.772137	333.555	90.5565	261.781	7.88048	2022.98	1975.33	179482	7.90116	0.889379	2.15055	3.77662	0.58085	0.0481021	70	37	16	6	5	4.81021			10.8844	4.08163	3.40136	47.619	25.1701	38	0
5	7	0	144	1.91667	3996	1985.57	21.8544	0.00570762	0.823574	0.000122171	0.0690691	0.778991	1414	2738.52	0.753055	324.897	92.7795	250.914	6.91196	1738.9	1703.35	165206	8.09512	0.892664	2.16349	3.80406	0.580907	0.036036	72	40	12	3	1	3.6036			8.33333	2.08333	0.694444	50	27.7778	38	0
5	8	0	423	2.65248	4901	1929.36	34.2326	0.0149187	0.825546	0.000136983	0.228933	0.741188	1091.6	2164.47	0.705461	343.278	100.372	270.9	5.40333	1434.88	1419.65	145325	8.75756	0.901683	2.30244	3.88793	0.602688	0.0863089	190	77	110	53	16	8.63089	10.9101		26.0047	12.5296	3.78251	44.9173	18.2033	38	0
5	9	0	403	2.54094	3696	1933.94	46.977	0.0170063	1.25433	0.000184916	0.277056	0.749995	1177.77	2286.68	0.711748	343.014	106.282	262.65	5.94118	1520.79	1516.53	159870	9.27327	0.89951	2.37129	3.96048	0.605603	0.109037	185	78	89	37	18	10.9037			22.0844	9.18114	4.4665	45.9057	19.3548	38	0
5	10	0	441	3.08163	3342	1915.93	118.15	0.0256973	3.9234	0.000552018	0.406643	0.758249	1205.3	2368.04	0.724263	337.188	95.9039	273.984	5.81396	1542.49	1534.54	151745	8.36773	0.89995	2.21511	3.7544	0.605691	0.131957	175	90	136	67	31	13.1957			30.839	15.1927	7.02948	39.6825	20.4082	38	0

## Sheet: Fig1a EXP5 061219 
		Database Name	Phenix DB
		Database Location	http://1400l18172/ODA/OdaService.asmx
		Evaluation Signature	19415ec0-aca0-4428-aafa-16b1822858dd
		Plate Name	Joanna retake 021219 24 hrs
		Measurement	Measurement 1
		Evaluation	Evaluation2
		[Data]
		Row	Column	Timepoint	infected cell (2) - Number of Objects	infected cell (2) - Intensity Nucleus HOECHST 33342 Mean - Mean per Well	infected cell (2) - Total Spot Area - Mean per Well	infected cell (2) - Relative Spot Intensity - Mean per Well	infected cell (2) - Number of Spots - Mean per Well	infected cell (2) - Number of Spots per Area of Cytoplasm - Mean per Well	infected cell (2) - Number of vacuole Selected- per Cell - Mean per Well	infected cell (2) - Relative Spot Intensity- Mean per Cell - Mean per Well	infected cell (2) - Intensity VACUOLE Mean- Mean per Cell - Mean per Well	infected cell (2) - Intensity VACUOLE Median- Mean per Cell - Mean per Well	infected cell (2) - Intensity VACUOLE Sum- Mean per Cell - Mean per Well	infected cell (2) - Vacuole Area [¬µm¬≤]- Mean per Cell - Mean per Well	infected cell (2) - Vacuole Roundness- Mean per Cell - Mean per Well	infected cell (2) - Vacuole Width [¬µm]- Mean per Cell - Mean per Well	infected cell (2) - Vacuole Length [¬µm]- Mean per Cell - Mean per Well	infected cell (2) - Vacuole Ratio Width to Length- Mean per Cell - Mean per Well	infected cell (2) - Number of TOXO in vacuole- per vacuole - Mean per Cell - Mean per Well	infected cell (2) - infected>4 - Mean per Well	infected cell (2) - infected>=6 toxo per vac - Mean per Well	infected cell (2) - infected>=8 toxo per vac - Mean per Well	Nuclei - Number of Objects	Nuclei - Intensity Nucleus HOECHST 33342 Mean - Mean per Well	Nuclei - Total Spot Area - Mean per Well	Nuclei - Relative Spot Intensity - Mean per Well	Nuclei - Number of Spots - Mean per Well	Nuclei - Number of Spots per Area of Cytoplasm - Mean per Well	Nuclei - Number of vacuole Selected- per Cell - Mean per Well	Nuclei - Relative Spot Intensity- Mean per Cell - Mean per Well	Nuclei - Intensity VACUOLE Mean- Mean per Cell - Mean per Well	Nuclei - Intensity VACUOLE Median- Mean per Cell - Mean per Well	Nuclei - Intensity VACUOLE Sum- Mean per Cell - Mean per Well	Nuclei - Vacuole Area [¬µm¬≤]- Mean per Cell - Mean per Well	Nuclei - Vacuole Roundness- Mean per Cell - Mean per Well	Nuclei - Vacuole Width [¬µm]- Mean per Cell - Mean per Well	Nuclei - Vacuole Length [¬µm]- Mean per Cell - Mean per Well	Nuclei - Vacuole Ratio Width to Length- Mean per Cell - Mean per Well	Nuclei - Number of TOXO in vacuole- per vacuole - Mean per Cell - Mean per Well	Nuclei - infected cell (2) - Mean per Well	infected>4 - Number of Objects	infected>=6 toxo per vac - Number of Objects	infected>=8 toxo per vac - Number of Objects	percent infected cell	average		Percent >4 toxo per cell
		2	2	0	256	3051.84	369.004	0.500823	3.16797	0.000733163	1.20312	0.875814	4981.8	5013.83	1.72538e+06	27.1306	0.885216	4.05114	6.50707	0.631125	3.3541	0.417969	0.183594	0.0195312	3610	3307.06	32.418	0.0359994	0.904709	0.000218192	0.0853186	0.875814	4981.8	5013.83	1.72538e+06	27.1306	0.885216	4.05114	6.50707	0.631125	3.3541	0.0709141	107	47	5	7.09141			41.7969
		2	3	0	184	2885.04	529.152	0.293502	2.5	0.000581968	1.17935	0.679132	1533.17	1544.65	703611	38.7296	0.862827	4.82592	7.81767	0.629293	5.04438	0.625	0.402174	0.190217	3063	3112.71	39.5952	0.018483	1.07117	0.000241372	0.0708456	0.679132	1533.17	1544.65	703611	38.7296	0.862827	4.82592	7.81767	0.629293	5.04438	0.0600718	115	74	35	6.00718			62.5
		2	4	0	326	2843.97	548.488	0.37704	3.01534	0.000661307	1.26687	0.767867	2327.34	2329.97	1.13189e+06	39.4321	0.865301	4.76818	7.80997	0.614498	4.86435	0.56135	0.383436	0.211656	2919	3008.17	71.4416	0.0430783	1.43063	0.000315151	0.141487	0.767867	2327.34	2329.97	1.13189e+06	39.4321	0.865301	4.76818	7.80997	0.614498	4.86435	0.111682	183	125	69	11.1682			56.135
		2	5	0	265	3144.42	500.309	0.377287	4.58113	0.000886312	1.21509	0.789691	2567.92	2582.58	1.20275e+06	36.6129	0.899953	4.78555	7.32994	0.653568	4.43101	0.550943	0.339623	0.158491	3032	3052.21	62.0782	0.0340721	2.65963	0.000538289	0.106201	0.789691	2567.92	2582.58	1.20275e+06	36.6129	0.899953	4.78555	7.32994	0.653568	4.43101	0.0874011	146	90	42	8.74011			55.0943
		2	6	0	339	2758.11	456.746	0.504895	5.99115	0.00124494	1.18584	0.877365	5235.02	5266.6	2.00593e+06	30.5578	0.885189	4.33525	6.88973	0.638824	3.9147	0.516224	0.20649	0.0589971	3195	2915.66	80.7712	0.0551963	4.06197	0.000820777	0.125822	0.877365	5235.02	5266.6	2.00593e+06	30.5578	0.885189	4.33525	6.88973	0.638824	3.9147	0.106103	175	70	20	10.6103			51.6224
		2	7	0	571	2673.8	446.897	0.496572	6.79685	0.00141738	1.18564	0.872246	5023.22	5082.48	1.91479e+06	30.1376	0.903652	4.41481	6.78769	0.651631	3.85388	0.502627	0.229422	0.0647986	5236	2733.69	84.4467	0.0560187	4.62872	0.00104628	0.129297	0.872246	5023.22	5082.48	1.91479e+06	30.1376	0.903652	4.41481	6.78769	0.651631	3.85388	0.109053	287	131	37	10.9053			50.2627
UPRT	no IFNg	2	8	0	543	2464.49	511.081	0.466733	10.2099	0.00190916	1.20994	0.857481	4831.96	4854.34	1.85232e+06	29.7469	0.882077	4.23529	6.79518	0.631693	3.68269	0.47698	0.21547	0.0570902	4978	2567.06	151.661	0.0553121	9.05564	0.00195863	0.131981	0.857481	4831.96	4854.34	1.85232e+06	29.7469	0.882077	4.23529	6.79518	0.631693	3.68269	0.10908	259	117	31	10.908	9.56276		47.698
GRA	no IFNg	2	9	0	422	2283.03	711.149	0.253742	13.3152	0.00222468	1.22512	0.646218	1555.87	1567.24	750312	40.8103	0.854792	4.9181	7.98863	0.623228	5.46623	0.680095	0.464455	0.244076	3816	2351.59	248.115	0.0359824	12.3456	0.00248205	0.135482	0.646218	1555.87	1567.24	750312	40.8103	0.854792	4.9181	7.98863	0.623228	5.46623	0.110587	287	196	103	11.0587	10.0043		68.0095
IST	no IFNg	2	10	0	587	2053.96	779.337	0.34936	13.5775	0.00218755	1.29642	0.73624	2247.58	2256.85	1.228e+06	44.2875	0.86223	5.12345	8.33179	0.618799	5.7883	0.664395	0.502555	0.298126	3864	2156.43	327.094	0.0614032	14.2738	0.00270135	0.196946	0.73624	2247.58	2256.85	1.228e+06	44.2875	0.86223	5.12345	8.33179	0.618799	5.7883	0.151915	390	295	175	15.1915	12.8932		66.4395
MYR	no IFNg	2	11	0	658	1993.51	751.441	0.353099	15.6489	0.00244119	1.28419	0.779909	2639.05	2641.28	1.19073e+06	36.3932	0.884774	4.65887	7.48381	0.629782	4.57038	0.585106	0.341945	0.150456	4126	1899.68	423.182	0.0687992	16.5603	0.00317305	0.204799	0.779909	2639.05	2641.28	1.19073e+06	36.3932	0.884774	4.65887	7.48381	0.629782	4.57038	0.159476	385	225	99	15.9476	15.2588		58.5106
		3	2	0	292	3009.38	413.045	0.528788	2.67808	0.000582071	1.14041	0.880823	5272.09	5334.39	2.07415e+06	31.6475	0.893079	4.51382	7	0.647216	3.88328	0.534247	0.229452	0.0513699	2745	3238.45	51.2699	0.0568471	1.01275	0.0002149	0.121311	0.880823	5272.09	5334.39	2.07415e+06	31.6475	0.893079	4.51382	7	0.647216	3.88328	0.106375	156	67	15	10.6375			53.4247
		3	3	0	171	2902.87	566.936	0.291172	2.49708	0.000558272	1.1462	0.660163	1524.87	1533.01	781448	43.7237	0.851816	5.15119	8.3553	0.62321	5.4386	0.701754	0.467836	0.204678	3025	3071.06	40.1372	0.0173796	0.920661	0.000199634	0.0647934	0.660163	1524.87	1533.01	781448	43.7237	0.851816	5.15119	8.3553	0.62321	5.4386	0.0565289	120	80	35	5.65289			70.1754
		3	4	0	256	2873.03	579.281	0.398322	2.46484	0.000533314	1.16406	0.759652	2319	2337.6	1.29547e+06	45.3314	0.863289	5.25034	8.40785	0.627428	5.5722	0.695312	0.492188	0.257812	3374	3019.1	50.9271	0.0308175	0.943983	0.000206148	0.0883225	0.759652	2319	2337.6	1.29547e+06	45.3314	0.863289	5.25034	8.40785	0.627428	5.5722	0.0758743	178	126	66	7.58743			69.5312
		3	5	0	288	3208.26	527.979	0.396001	3.74306	0.000718371	1.17708	0.793937	2605.42	2632.77	1.26663e+06	39.3405	0.887966	4.956	7.77778	0.637293	4.79282	0.652778	0.399306	0.173611	3358	3069.63	56.7335	0.0346567	1.78976	0.000359476	0.100953	0.793937	2605.42	2632.77	1.26663e+06	39.3405	0.887966	4.956	7.77778	0.637293	4.79282	0.0857653	188	115	50	8.57653			65.2778
		3	6	0	329	3094.39	522.815	0.38138	5.07599	0.000952598	1.19757	0.793575	2638.12	2660.3	1.22226e+06	37.4144	0.889866	4.8355	7.50756	0.645638	4.51292	0.617021	0.334347	0.115502	3517	2993.35	72.0142	0.0366693	3.32471	0.000641542	0.112027	0.793575	2638.12	2660.3	1.22226e+06	37.4144	0.889866	4.8355	7.50756	0.645638	4.51292	0.0935456	203	110	38	9.35456			61.7021
		3	7	0	714	3047.9	450.371	0.363362	5.80812	0.00127603	1.28571	0.788	2507.76	2523.75	962805	30.5807	0.894306	4.32465	6.85132	0.629803	3.95472	0.481793	0.296919	0.116246	6680	2890.62	79.6566	0.0405831	4.2753	0.00111956	0.137425	0.788	2507.76	2523.75	962805	30.5807	0.894306	4.32465	6.85132	0.629803	3.95472	0.106886	344	212	83	10.6886			48.1793
UPRT	no IFNg	3	8	0	479	2497.56	488.104	0.479912	9.73278	0.00186737	1.17328	0.85871	4895	4926.62	1.87722e+06	29.5232	0.894411	4.30473	6.70687	0.648239	3.78967	0.528184	0.212944	0.0605428	5829	2609.9	128.892	0.0436496	8.44879	0.00192135	0.0964145	0.85871	4895	4926.62	1.87722e+06	29.5232	0.894411	4.30473	6.70687	0.648239	3.78967	0.0821753	253	102	29	8.21753			52.8184
GRA	no IFNg	3	9	0	427	2348.62	661.836	0.240425	13.089	0.00223158	1.20141	0.65027	1537.82	1550.47	700396	38.5151	0.867894	4.89651	7.7218	0.636154	5.21565	0.688525	0.428571	0.213115	4771	2440.33	227.796	0.0292682	12.3523	0.00258736	0.107525	0.65027	1537.82	1550.47	700396	38.5151	0.867894	4.89651	7.7218	0.636154	5.21565	0.0894991	294	183	91	8.94991			68.8525
IST	no IFNg	3	10	0	520	2153.62	679.394	0.326079	12.5596	0.00215773	1.22885	0.732242	2161.12	2159.24	1.0593e+06	39.312	0.862473	4.78712	7.76896	0.617748	5.05564	0.586538	0.411538	0.251923	4908	2299.69	254.609	0.0420162	12.9984	0.00259497	0.130196	0.732242	2161.12	2159.24	1.0593e+06	39.312	0.862473	4.78712	7.76896	0.617748	5.05564	0.105949	305	214	131	10.5949			58.6538
MYR	no IFNg	3	11	0	703	2269.46	703.679	0.350475	14.4765	0.00237828	1.23471	0.773577	2568.03	2572.34	1.17312e+06	36.3276	0.879313	4.66498	7.44583	0.634881	4.74317	0.611664	0.359886	0.165007	4825	2165.44	338.785	0.0606541	14.9554	0.00295255	0.179896	0.773577	2568.03	2572.34	1.17312e+06	36.3276	0.879313	4.66498	7.44583	0.634881	4.74317	0.145699	430	253	116	14.5699			61.1664
		4	2	0	69	3241.57	251.203	0.339379	5.30435	0.000868929	1.17391	0.888563	5321.88	5180.69	954489	14.702	0.897018	2.73423	4.7814	0.591861	2.07971	0.0869565	0.0434783	0.0289855	1406	2982.07	35.4787	0.0177594	2.11309	0.000352002	0.0576102	0.888563	5321.88	5180.69	954489	14.702	0.897018	2.73423	4.7814	0.591861	2.07971	0.0490754	6	3	2	4.90754			8.69565
		4	3	0	22	2959.28	215.045	0.135745	5.59091	0.000815947	1.13636	0.785026	1826.34	1723.13	245203	12.1135	0.878022	2.52277	4.6131	0.551168	1.94697	0.0909091	0	0	1734	2961.89	15.5669	0.00232199	1.76874	0.000282982	0.0144175	0.785026	1826.34	1723.13	245203	12.1135	0.878022	2.52277	4.6131	0.551168	1.94697	0.0126874	2	0	0	1.26874			9.09091
		4	4	0	72	2889.05	318.486	0.2455	4.09722	0.000673358	1.18056	0.824637	2657.62	2577.13	661635	21.1074	0.873014	3.29046	5.76661	0.578659	2.71065	0.222222	0.125	0.0416667	1630	2893.55	30.9405	0.0115947	1.81595	0.000308635	0.0521472	0.824637	2657.62	2577.13	661635	21.1074	0.873014	3.29046	5.76661	0.578659	2.71065	0.0441718	16	9	3	4.41718			22.2222
		4	5	0	65	2909.12	264.569	0.243582	6.36923	0.00113716	1.24615	0.848429	3152.21	3094.59	547931	15.1027	0.900227	2.92359	4.96756	0.588534	2.29231	0.138462	0.0769231	0.0153846	1479	2810.27	40.3543	0.0120052	3.15281	0.000551383	0.0547667	0.848429	3152.21	3094.59	547931	15.1027	0.900227	2.92359	4.96756	0.588534	2.29231	0.0439486	9	5	1	4.39486			13.8462
		4	6	0	66	2578.8	250.742	0.304854	7.5	0.00109891	1.18182	0.891158	5779.05	5663.17	880369	12.6243	0.895817	2.70533	4.66111	0.5866	1.73232	0.0454545	0	0	1717	2681.45	66.5976	0.0139163	4.9703	0.000760899	0.0454281	0.891158	5779.05	5663.17	880369	12.6243	0.895817	2.70533	4.66111	0.5866	1.73232	0.0384391	3	0	0	3.84391			4.54545
		4	7	0	79	2594.65	284.203	0.252506	10.4937	0.00159404	1.25316	0.848615	4965.85	4869.53	672717	10.5564	0.904811	2.43588	4.14535	0.610176	1.71203	0.0506329	0.0126582	0	3019	2537.49	63.4117	0.00885608	5.37463	0.000836625	0.0327923	0.848615	4965.85	4869.53	672717	10.5564	0.904811	2.43588	4.14535	0.610176	1.71203	0.0261676	4	1	0	2.61676			5.06329
UPRT	pre	4	8	0	76	2148.83	366.105	0.234615	17.4737	0.00216531	1.27632	0.849836	4877.47	4768.32	654923	10.4956	0.908059	2.43592	4.09759	0.60212	1.64254	0.0526316	0	0	2582	2288.33	159.941	0.0118479	12.1317	0.00166502	0.0375678	0.849836	4877.47	4768.32	654923	10.4956	0.908059	2.43592	4.09759	0.60212	1.64254	0.0294345	4	0	0	2.94345	3.09272	32.3413	5.26316
GRA	pre	4	9	0	45	2232.19	442.356	0.103074	20.1556	0.00236249	1.22222	0.750475	1738.11	1699.69	239502	12.378	0.900848	2.69548	4.58649	0.597634	1.72063	0.0888889	0	0	2243	2230.73	228.21	0.00780002	16.4097	0.00203955	0.0245207	0.750475	1738.11	1699.69	239502	12.378	0.900848	2.69548	4.58649	0.597634	1.72063	0.0200624	4	0	0	2.00624	1.46511	14.6448	8.88889
IST	pre	4	10	0	88	2009.31	491.807	0.15418	22.1364	0.00242484	1.28409	0.815599	2664.57	2575.51	409873	13.527	0.861627	2.6634	5.01977	0.530675	1.83699	0.102273	0	0	2063	2060.18	267.713	0.0133412	17.7431	0.00213875	0.0547746	0.815599	2664.57	2575.51	409873	13.527	0.861627	2.6634	5.01977	0.530675	1.83699	0.0426563	9	0	0	4.26563	3.95898	30.7059	10.2273
MYR	pre	4	11	0	116	2071.01	536.802	0.185636	23.819	0.00260446	1.32759	0.836897	3119.92	3043.3	499763	13.8654	0.901797	2.80033	4.78161	0.591923	1.94454	0.0948276	0.0172414	0.00862069	1766	1927.83	306.086	0.0196169	19.1348	0.00229837	0.0872027	0.836897	3119.92	3043.3	499763	13.8654	0.901797	2.80033	4.78161	0.591923	1.94454	0.0656852	11	2	1	6.56852	6.97637	45.7203	9.48276
		5	2	0	65	2999.83	261.615	0.348237	5.6	0.000919066	1.32308	0.899283	6061.03	5971.33	917392	13.0579	0.896897	2.69023	4.84849	0.558859	1.77051	0.0153846	0.0153846	0	1603	3053.55	32.7536	0.0153381	1.67311	0.000279184	0.0536494	0.899283	6061.03	5971.33	917392	13.0579	0.896897	2.69023	4.84849	0.558859	1.77051	0.040549	1	1	0	4.0549			1.53846
		5	3	0	15	3075.46	113.733	0.097633	1.66667	0.000282198	1.2	0.778783	1568.85	1511.47	160662	7.98504	0.879179	1.99018	3.70417	0.562363	1.5	0.0666667	0	0	2065	2884.64	7.68523	0.00103879	0.726392	0.000126412	0.00871671	0.778783	1568.85	1511.47	160662	7.98504	0.879179	1.99018	3.70417	0.562363	1.5	0.00726392	1	0	0	0.726392			6.66667
		5	4	0	47	2845.66	360.638	0.219699	5.38298	0.000796965	1.29787	0.840251	2972.28	2888.88	519728	15.2995	0.868073	2.81012	5.14735	0.557108	2.10904	0.106383	0.0425532	0.0212766	1780	2857.32	22.0927	0.00642043	1.48989	0.000235964	0.0342697	0.840251	2972.28	2888.88	519728	15.2995	0.868073	2.81012	5.14735	0.557108	2.10904	0.0264045	5	2	1	2.64045			10.6383
		5	5	0	37	2761.18	331.243	0.265745	4.59459	0.000665021	1.43243	0.847258	2986.57	2885.5	601480	17.2588	0.896137	3.01785	5.38666	0.571151	2.27027	0.135135	0.108108	0.027027	1911	2807.17	26.4296	0.00608726	2.236	0.000376312	0.0277342	0.847258	2986.57	2885.5	601480	17.2588	0.896137	3.01785	5.38666	0.571151	2.27027	0.0193616	5	4	1	1.93616			13.5135
		5	6	0	46	2745.9	246.457	0.228204	6.28261	0.00103116	1.15217	0.836448	3005.08	2918.9	509681	14.2713	0.888924	2.79547	4.82456	0.588666	2.0471	0.108696	0	0	1919	2724.52	33.4143	0.00652532	3.2074	0.000512707	0.0276186	0.836448	3005.08	2918.9	509681	14.2713	0.888924	2.79547	4.82456	0.588666	2.0471	0.0239708	5	0	0	2.39708			10.8696
		5	7	0	88	2558.89	244.114	0.206324	9.40909	0.00142644	1.21591	0.852683	3318.84	3230.72	435011	11.2291	0.905714	2.56287	4.47208	0.594715	1.71307	0.0681818	0	0	2996	2513.22	49.2006	0.0075551	4.89286	0.000763535	0.0357143	0.852683	3318.84	3230.72	435011	11.2291	0.905714	2.56287	4.47208	0.594715	1.71307	0.0293725	6	0	0	2.93725			6.81818
UPRT	pre	5	8	0	84	2354.72	364.202	0.245421	16.4048	0.00202132	1.28571	0.851809	4657.55	4568.29	660867	10.9864	0.916798	2.51384	4.23509	0.609166	1.64683	0.0357143	0.0119048	0	2591	2367.27	168.26	0.0127343	12.4956	0.00164448	0.0416827	0.851809	4657.55	4568.29	660867	10.9864	0.916798	2.51384	4.23509	0.609166	1.64683	0.0324199	3	1	0	3.24199			3.57143
GRA	pre	5	9	0	22	1907.53	439.773	0.0849488	16.1818	0.00161195	1.18182	0.739856	1627.53	1577.32	246607	13.8362	0.8678	2.5557	4.73075	0.553428	2.16364	0.181818	0.0454545	0	2381	2203.01	195.1	0.00594372	15.0034	0.00189101	0.0109198	0.739856	1627.53	1577.32	246607	13.8362	0.8678	2.5557	4.73075	0.553428	2.16364	0.00923982	4	1	0	0.923982			18.1818
IST	pre	5	10	0	79	1927.81	462.253	0.180699	18.1392	0.00215256	1.43038	0.802443	2548.17	2471.18	441820	14.5868	0.875458	2.73956	5.06225	0.552682	1.97257	0.0759494	0.0126582	0	2163	2051.68	195.663	0.0115793	14.3005	0.00179886	0.0522423	0.802443	2548.17	2471.18	441820	14.5868	0.875458	2.73956	5.06225	0.552682	1.97257	0.0365233	6	1	0	3.65233			7.59494
MYR	pre	5	11	0	118	2022.42	475.661	0.203514	20.4407	0.00225895	1.36441	0.843482	3223.09	3135.17	514908	14.1043	0.89769	2.85644	4.9594	0.571528	1.97218	0.0847458	0	0	1598	1959.7	275.83	0.0221174	17.6151	0.00212831	0.100751	0.843482	3223.09	3135.17	514908	14.1043	0.89769	2.85644	4.9594	0.571528	1.97218	0.0738423	10	0	0	7.38423			8.47458
[truncated: 8 more columns]

## Sheet: Fig1a ALL for plot
number of infected cells
	WT	ΔGRA12	ΔMYR1	ΔIST
EXP1	61.0396	11.7238	44.4257	36.4205
EXP2	82.5527	28.3453	70.1444	58.2192
EXP3	44.1809	11.9447	45.895	42.3782
EXP4	74.1641	47.8837	37.3298	58.1784
EXP5	32.3413	14.6448	45.7203	30.7059
