# Supplementary material for: Paracrine rescue of MYR1-deficient Toxoplasma gondii mutants reveals limitations of pooled in vivo CRISPR screens
Source: eLife. 2024 Dec 10;13:RP102592. doi: 10.7554/eLife.102592 (PMC11630813; doi:10.7554/eLife.102592)
Supplement: Figure 1—source data 2. [file elife-102592-fig1-data2.xlsx]

## Sheet: Fig1c EXP1-3
Normalised Competition Assays
190816 HFF Competition	HFF	dGRA12-mCh	Day	Input	Output
			Mean Ratio	0.971059	1.07755
			SD	0	0.111479
			Normalised Ratio	1	1.10966
			Normalised SD	0	0.114802
	HFF	dMYR1-mCh	Day	Input	Output
			Mean Ratio	0.978673	0.700655
			SD	0	0.0678126
			Normalised Ratio	1	0.715923
			Normalised SD	0	0.0692903
	HFF	dMYR1-GFP	Day	Input	Output
			Mean Ratio	0.83429	0.506523
			SD	0	0.00825034
			Normalised Ratio	1	0.607131
			Normalised SD	0	0.00988906
190813 BMDM Competition	HFF	dGRA12-mCh	Day	Input	Output
			Mean Ratio	1.2691	0.916277
			SD	0	0.0758279
			Normalised Ratio	1	0.721988
			Normalised SD	0	0.0597493
	HFF	dMYR1-mCh	Day	Input	Output
			Mean Ratio	1.36185	0.555897
			SD	0	0.0549067
			Normalised Ratio	1	0.408191
			Normalised SD	0	0.0403176
	BMDM-IFNy	dGRA12-mCh	Day	Input	Output
			Mean Ratio	1.2691	1.25239
			SD	0	0.119287
			Normalised Ratio	1	0.986831
			Normalised SD	0	0.0939936
	BMDM-IFNy	dMYR1-mCh	Day	Input	Output
			Mean Ratio	1.36185	0.635074
			SD	0	0.0542602
			Normalised Ratio	1	0.466331
			Normalised SD	0	0.039843
	BMDM+IFNy	dGRA12-mCh	Day	Input	Output
			Mean Ratio	1.2691	0.21525
			SD	0	0.165966
			Normalised Ratio	1	0.169608
			Normalised SD	0	0.130774
	BMDM+IFNy	dMYR1-mCh	Day	Input	Output
			Mean Ratio	1.36185	0.59727
			SD	0	0.129223
			Normalised Ratio	1	0.438572
			Normalised SD	0	0.0948873
190725 BMDM Competition	BMDM-IFNy	dGRA12-mCh	Day	Input	Output
			Mean Ratio	1.61468	1.27401
			SD	0	0.258115
			Normalised Ratio	1	0.789018
			Normalised SD	0	0.159855
	BMDM+IFNy	dGRA12-mCh	Day	Input	Output
			Mean Ratio	1.61468	0.376719
			SD	0	0.10016
			Normalised Ratio	1	0.233309
			Normalised SD	0	0.0620309
	BMDM-IFNy	dMYR1-mCh	Day	Input	Output
			Mean Ratio	1.9945	0.674275
			SD	0	0.266927
			Normalised Ratio	1	0.338068
			Normalised SD	0	0.133832
	BMDM+IFNy	dMYR1-mCh	Day	Input	Output
			Mean Ratio	1.9945	0.724259
			SD	0	0.0732275
			Normalised Ratio	1	0.363129
			Normalised SD	0	0.0367148

## Sheet: Fig1c - ALL for plot
	HFF			BMDM - IFN-γ			BMDM + IFN-γ
GRA12	EXP1	EXP2		EXP1	EXP2		EXP1	EXP2
Input	1	1		1	1		1	1
Output	1.10966	0.721989		0.986831	0.789018		0.169608	0.233309
MYR1
Input	1	1		1	1		1	1
Output	0.715923	0.408191		0.466331	0.338068		0.438572	0.363128
