# Supplementary material for: Paracrine rescue of MYR1-deficient Toxoplasma gondii mutants reveals limitations of pooled in vivo CRISPR screens
Source: eLife. 2024 Dec 10;13:RP102592. doi: 10.7554/eLife.102592 (PMC11630813; doi:10.7554/eLife.102592)
Supplement: Figure 1—source data 3. [file elife-102592-fig1-data3.xlsx]

## Sheet: Fig1d - source data
Plaques area
WT	ΔMYR1
8	1.1
1.8	2.9
1.5	0.9
3.1	0.7
1	1.8
2.1	0.9
1.1	0.9
3.7	0.6
5.3	1.1
1.9	1.8
2.7	2.2
0.9	1.4
2.2	1.6
2.4	2.7
1.9	1.9
2.6	1.2
4.1	0.8
5.2	2.3
4.9	4.6
3	3.6
3.8	1.1
2.4	0.7
3	1.6
2.5	3.2
1.9	0.9
3.4	0.6
2.7	1.5
4	2.2
1.7	1.5
2.9	1.5
2.8	1.8
1.6	3.2
2.7	0.7
1.9	0.5
1.6	1.3
4	1.2
0.9	0.5
5.3	0.7
3.3	1.1
1.4	1.1
2.6	0.9
3.3	0.9
3	0.4
2	1.6
3.1	0.4
2.2	0.5
2	0.8
2.7	0.7
3	1
4.1	1.1
2.4	1.6
1.8	0.7
1.4	0.7
3.1	0.7
3	1.1
4	0.9
2.6	0.8
4.1	1.9
2.4	1.4
3.7	0.9
2.9	1.4
3.5	0.7
3.2	0.8
2	0.9
6.2	0.9
1.6	1.5
2.8	1
1.4	0.7
4.7	0.6
4.9	1.1
4.1	0.6
5.1	1
5.2	1.5
1.3	0.6
3.7	1.4
1.9	0.6
1.6	0.9
3.1	0.6
5.6	1.1
6.8	1.1
1.1	1.3
3.1	1
3.2	0.9
1	0.7
2.3	1.7
3.8	0.4
2.1	0.7
1.8	1.1
3.4	0.5
1.8	1.6
1.3	0.8
1.3	1
2.7	1.1
1.3	0.7
2.5	0.4
2.4
1.6
5.1
3.5
2.6
1.6
4.5
3
1.6
2.7
4.3
0.7
1.9
1.7
1.6
2.4
2.2
0.9
1.8
1.3
1.3
1.1
1.1
1.3
1.2
1
2.3
4.4
1
2.2
2.1
1.5
1.8
2.3
1.6
2.1
2.6
2.1
1.7
0.6
3.9
2.1
1.3
0.8
1.2
1.6
2.3
3.1
4
3.1
0.9
1.8
1.8
2.3
2
1.5
2.1
1.7
1.8
1.5
2.5
0.7
4.2
2.4
3.5
1.7
1.2
2.3
1.7
2
1.3
3.4
2.4
3.1
1.3
1.5
1
1.9
3
1.8
1.9
0.6
1.4
1.9
0.9
2.6
3
5.9
2.2
1.9
2.4
2.7
1.3
1.5
3.4
2.4
4.2
0.8
1.7
3.2
3.7
3.7
1.1
1
2
1.4
1.6
