# Supplementary material for: Paracrine rescue of MYR1-deficient Toxoplasma gondii mutants reveals limitations of pooled in vivo CRISPR screens
Source: eLife. 2024 Dec 10;13:RP102592. doi: 10.7554/eLife.102592 (PMC11630813; doi:10.7554/eLife.102592)
Supplement: Figure 2—source data 3. [file elife-102592-fig2-data3.xlsx]

## Sheet: Exp 1
		Total flux readings (log10(photons/s))
experimental condition		25K tachyzoites Pru dKU80-LucHA (WT-Luc)
mouse no.		1	2	3	4	5
Timepoint	Day 3	202000000	274000000	142000000	946000	21100000
	Day 5	1230000000	2050000000	1240000000	14700000	142000000
	Day 7	5580000000	3250000000	3850000000	166000000	2420000000
experimental condition		25K tachyzoites Pru dMYR1-LucHA-mCHerry (dMYR1-Luc)
mouse no.		1	2	3	4	5
Timepoint	Day 3	365000	1820000	19400000	31800000	1940000
	Day 5	182000000	45500000	68600000	9340000	2560000000
	Day 7	189000000	22500000	33100000	28600000	34300000

## Sheet: Exp 2
		Total flux readings (log10(photons/s))
experimental condition		25K tachyzoites Pru dKU80-LucHA (WT-Luc)
mouse no.		1	2	3	4	5	6	7	8	9
Timepoint	Day 3	185000000	91300000	111000000	90300000	224000000	88800000	39300000	167000000	228000000
	Day 5	2070000000	836000000	1180000000	1030000000	1160000000	1950000000
	Day 7	138000000	1470000000	1880000000
experimental condition		25K tachyzoites Pru dMYR1-LucHA-mCHerry (dMYR1-Luc)
mouse no.		1	2	3	4	5	6	7	8	9
Timepoint	Day 3	6540000	14100000	9660000	16100000	14300000	15000000	8430000	11200000	33000000
	Day 5	19400000	48300000	54900000	32500000	32900000	155000000
	Day 7	41400000	17300000	14800000
