# Supplementary material for: Paracrine rescue of MYR1-deficient Toxoplasma gondii mutants reveals limitations of pooled in vivo CRISPR screens
Source: eLife. 2024 Dec 10;13:RP102592. doi: 10.7554/eLife.102592 (PMC11630813; doi:10.7554/eLife.102592)
Supplement: Figure 3—source data 3. [file elife-102592-fig3-data3.xlsx]

## Sheet: Exp 1
		Total flux readings (log10(photons/s))
experimental condition		20% dMYR1-Luc (5K tachyzoites) + 80% dKU80 (WT) (20K tachyzoites)
mouse no.		1	2	3	4	5
Timepoint	Day 3	1930000	3530000	5050000	2640000	1970000
	Day 5	1360000	48800000	2820000	1260000	158000000
	Day 7	143000000	153000000	171000000	124000000	85900000
experimental condition		20% dMYR1-Luc (5K tachyzoites) + 80% dMYR1 (20K tachyzoites)
mouse no.		1	2	3	4
Timepoint	Day 3	282000	2860000	2920000	2190000
	Day 5	30500000	23600000	51000000	22900000
	Day 7	42300000	42700000	33100000	19500000

## Sheet: Exp 2
		Total flux readings (log10(photons/s))
experimental condition		20% dMYR1-Luc (5K tachyzoites) + 80% dKU80 (WT) (20K tachyzoites)
mouse no.		1	2	3	4	5
Timepoint	Day 3	397000	610000	433000	360000	359000
	Day 5	3240000	4250000	223000	1350000	2580000
	Day 7	11400000	29300000	7090000	2880000	1480000
experimental condition		20% dMYR1-Luc (5K tachyzoites) + 80% dMYR1 (20K tachyzoites)
mouse no.		1	2	3	4	5	6
Timepoint	Day 3	112000	553000	686000	223000	692000	414000
	Day 5	81600	1090000	1300000	4260000	3680000	2040000
	Day 7	98200	1330000	485000	6140000	5420000	4410000

## Sheet: Exp 3
		Total flux readings (log10(photons/s))
experimental condition		20% dMYR1-Luc (5K tachyzoites) + 80% dKU80 (WT) (20K tachyzoites)
mouse no.		1	2	3	4	5
Timepoint	Day 3	1280000	1800000	2770000	817000	1960000
	Day 5	5310000	7370000	15700000	6260000	15700000
	Day 7	6290000	20200000	28900000	7350000	36300000
experimental condition		20% dMYR1-Luc (5K tachyzoites) + 80% dMYR1 (20K tachyzoites)
mouse no.		1	2	3	4	5
Timepoint	Day 3	797000	553000	1240000	1100000	1600000
	Day 5	1940000	1240000	2730000	4380000	3220000
	Day 7	7270000	1070000	3610000	7730000	2900000

## Sheet: Exp 4
		Total flux readings (log10(photons/s))
experimental condition		20% dMYR1-Luc (5K tachyzoites) + 80% dKU80 (WT) (20K tachyzoites)
mouse no.		1	2	3
Timepoint	Day 3	4100000	4130000	1350000
	Day 5	25700000	41100000	14900000
	Day 7	40200000	23600000	20200000
experimental condition		20% dMYR1-Luc (5K tachyzoites) + 80% dMYR1 (20K tachyzoites)
mouse no.		1	2
Timepoint	Day 3	1400000	1690000
	Day 5	3380000	6440000
	Day 7	6010000	8340000
