# Supplementary material for: Paracrine rescue of MYR1-deficient Toxoplasma gondii mutants reveals limitations of pooled in vivo CRISPR screens
Source: eLife. 2024 Dec 10;13:RP102592. doi: 10.7554/eLife.102592 (PMC11630813; doi:10.7554/eLife.102592)
Supplement: Figure 3—source data 4. [file elife-102592-fig3-data4.xlsx]

## Sheet: CCL2 - Peritoneal Lavage
		CCL2/MCP-1 levels (ng/mL) - Day 7 p.i.
Experiment 1	experimental condition	20% dMYR1-Luc (5K tachyzoites) + 80% dKU80 (WT) (20K tachyzoites)
	mouse no.	1	2	3	4	5
		9.24338	28.525	54.358	17.0245	51.596
	experimental condition	20% dMYR1-Luc (5K tachyzoites) + 80% dMYR1 (20K tachyzoites)
	mouse no.	1	2	3	4	5
		2.09461	7.21248	1.76967	7.21248	6.31888
Experiment 2	experimental condition	20% dMYR1-Luc (5K tachyzoites) + 80% dKU80 (WT) (20K tachyzoites)
	mouse no.	1	2	3
		23.6307	26.8301	28.4974
	experimental condition	20% dMYR1-Luc (5K tachyzoites) + 80% dMYR1 (20K tachyzoites)
	mouse no.	1	2
		0.393863	0.520036
Experiment 3	experimental condition	20% dMYR1-Luc (5K tachyzoites) + 80% dKU80 (WT) (20K tachyzoites)
	mouse no.	1	2	3	4	5
		30.6624	16.6915	33.5678	31.9078	6.82413
	experimental condition	20% dMYR1-Luc (5K tachyzoites) + 80% dMYR1 (20K tachyzoites)
	mouse no.	1	2	3	4	5
		2.39757	0.557916	4.33418	1.0144	0.931407

## Sheet: CCL2 - Serum
		CCL2/MCP-1 levels (ng/mL) - Day 7 p.i.
Experiment 1	experimental condition	20% dMYR1-Luc (5K tachyzoites) + 80% dKU80 (WT) (20K tachyzoites)
	mouse no.	1	2	3	4	5
		16.2294	45.1656	35.0932	16.2294	24.246
	experimental condition	20% dMYR1-Luc (5K tachyzoites) + 80% dMYR1 (20K tachyzoites)
	mouse no.	1	2	3	4	5
		0.972112	0.716428	4.35694	0.956616	1.08058
Experiment 2	experimental condition	20% dMYR1-Luc (5K tachyzoites) + 80% dKU80 (WT) (20K tachyzoites)
	mouse no.	1	2	3
		15.6401	8.99679	3.29403
	experimental condition	20% dMYR1-Luc (5K tachyzoites) + 80% dMYR1 (20K tachyzoites)
	mouse no.	1	2
		0.600873	1.59297
Experiment 3	experimental condition	20% dMYR1-Luc (5K tachyzoites) + 80% dKU80 (WT) (20K tachyzoites)
	mouse no.	1	2	3	4	5
		15.6949	26.0419	66.0554	46.2231	17.931
	experimental condition	20% dMYR1-Luc (5K tachyzoites) + 80% dMYR1 (20K tachyzoites)
	mouse no.	1	2	3	4	5
		1.63786	1.7931	4.74266	3.19026	0.815794

## Sheet: IFNg - Peritoneal Lavage
		IFNg levels (ng/mL) - Day 7 p.i.
Experiment 1	experimental condition	20% dMYR1-Luc (5K tachyzoites) + 80% dKU80 (WT) (20K tachyzoites)
	mouse no.	1	2	3
		5446.84	1075.07	6501.79
	experimental condition	20% dMYR1-Luc (5K tachyzoites) + 80% dMYR1 (20K tachyzoites)
	mouse no.	1	2
		1.37027	1.37027
Experiment 2	experimental condition	20% dMYR1-Luc (5K tachyzoites) + 80% dKU80 (WT) (20K tachyzoites)
	mouse no.	1	2	3	4	5
		1734.41	3007.29	5974.32	7029.26	1130.94
	experimental condition	20% dMYR1-Luc (5K tachyzoites) + 80% dMYR1 (20K tachyzoites)
	mouse no.	1	2	3	4	5
		226.107	1.58625	144.035	69.4856	3.74605

## Sheet: IL12-p40 - Peritoneal Lavage
			IL-12p40 levels (ng/mL) - Day 7 p.i.
Experiment 1	experimental condition		20% dMYR1-Luc (5K tachyzoites) + 80% dKU80 (WT) (20K tachyzoites)
	mouse no.		1	2	3
			6.30002	8.89106	13.4254
	experimental condition		20% dMYR1-Luc (5K tachyzoites) + 80% dMYR1 (20K tachyzoites)
	mouse no.		1	2
			6.94778	8.2433
Experiment 2	experimental condition		20% dMYR1-Luc (5K tachyzoites) + 80% dKU80 (WT) (20K tachyzoites)
	mouse no.		1	2	3	4	5
			5.0045	12.1299	5.74731	3.28582	7.59554
	experimental condition		20% dMYR1-Luc (5K tachyzoites) + 80% dMYR1 (20K tachyzoites)
	mouse no.		1	2	3	4	5
			13.4254	4.90522	12.1299	12.1299	6.30002

## Sheet: IL12-p40 - Serum
			IL-12p40 levels (ng/mL) - Day 7 p.i.
Experiment 1	experimental condition		20% dMYR1-Luc (5K tachyzoites) + 80% dKU80 (WT) (20K tachyzoites)
	mouse no.		1	2
			10.1866	5.55298
	experimental condition		20% dMYR1-Luc (5K tachyzoites) + 80% dMYR1 (20K tachyzoites)
	mouse no.		1	2
			8.89106	12.1299
Experiment 2	experimental condition		20% dMYR1-Luc (5K tachyzoites) + 80% dKU80 (WT) (20K tachyzoites)
	mouse no.		1	2
			14.7209	12.1299
	experimental condition		20% dMYR1-Luc (5K tachyzoites) + 80% dMYR1 (20K tachyzoites)
	mouse no.		1
			10.1866

## Sheet: TNF - Peritoneal Lavage
		TNF levels (ng/mL) - Day 7 p.i.
Experiment 1	experimental condition	20% dMYR1-Luc (5K tachyzoites) + 80% dKU80 (WT) (20K tachyzoites)
	mouse no.	1	2	3
		0.137899	0.113947	0.156719
	experimental condition	20% dMYR1-Luc (5K tachyzoites) + 80% dMYR1 (20K tachyzoites)
	mouse no.	1	2
		0.0301128	0.060909
Experiment 2	experimental condition	20% dMYR1-Luc (5K tachyzoites) + 80% dKU80 (WT) (20K tachyzoites)
	mouse no.	1	2	3	4	5
		0.124212	0.136189	0.178961	0.12079	0.0865724
	experimental condition	20% dMYR1-Luc (5K tachyzoites) + 80% dMYR1 (20K tachyzoites)
	mouse no.	1	2	3	4	5
		0.132767	0.0472217	0.095127	0.105392	0.060909

## Sheet: TNF - Serum
		TNF levels (ng/mL) - Day 7 p.i.
Experiment 1	experimental condition	20% dMYR1-Luc (5K tachyzoites) + 80% dKU80 (WT) (20K tachyzoites)
	mouse no.	1	2
		0.131056	0.0773345
	experimental condition	20% dMYR1-Luc (5K tachyzoites) + 80% dMYR1 (20K tachyzoites)
	mouse no.	1	2
		0.00874561	0.00342483
Experiment 2	experimental condition	20% dMYR1-Luc (5K tachyzoites) + 80% dKU80 (WT) (20K tachyzoites)
	mouse no.	1	2
		0.23354	0.0369563
	experimental condition	20% dMYR1-Luc (5K tachyzoites) + 80% dMYR1 (20K tachyzoites)
	mouse no.	1
		0.165274
