# Supplementary material for: Paracrine rescue of MYR1-deficient Toxoplasma gondii mutants reveals limitations of pooled in vivo CRISPR screens
Source: eLife. 2024 Dec 10;13:RP102592. doi: 10.7554/eLife.102592 (PMC11630813; doi:10.7554/eLife.102592)
Supplement: Figure 3—source data 7. [file elife-102592-fig3-data7.xlsx]

## Sheet: Exp 1
		Total flux readings (log10(photons/s)) - Day 7 p.i.
experimental condition		20% dMYR1-Luc (5K tachyzoites) + 80% dKU80 (WT) (20K tachyzoites)
mouse no.		1	2	3	4	5
Genotype	C57BL/6NTac (WT)	15500000	29500000	18700000	9560000	17500000
mouse no.		1	2	3	4	5	6
Genotype	Rag2 KO	293000000	40400000	81000000	47300000	207000000	102000000
experimental condition		20% dMYR1-Luc (5K tachyzoites) + 80% dMYR1 (20K tachyzoites)
mouse no.		1	2	3	4
Genotype	C57BL/6NTac (WT)	8890000	39100000	2940000	1660000
mouse no.		1	2	3	4
Genotype	Rag2 KO	25500000	32000000	25100000	70300000

## Sheet: Exp 2
		Total flux readings (log10(photons/s)) - Day 7 p.i.
experimental condition		20% dMYR1-Luc (5K tachyzoites) + 80% dKU80 (WT) (20K tachyzoites)
mouse no.		1	2	3	4	5
Genotype	C57BL/6NTac (WT)	75700000	139000000	63400000	53000000	61900000
mouse no.		1	2	3	4
Genotype	Rag2 KO	1990000000	1030000000	198000000	310000000
experimental condition		20% dMYR1-Luc (5K tachyzoites) + 80% dMYR1 (20K tachyzoites)
mouse no.		1	2	3	4
Genotype	C57BL/6NTac (WT)	20100000	29200000	8510000	2520000
mouse no.		1	2	3	4
Genotype	Rag2 KO	316000000	148000000	26200000	178000000
