# Supplementary material for: Paracrine rescue of MYR1-deficient Toxoplasma gondii mutants reveals limitations of pooled in vivo CRISPR screens
Source: eLife. 2024 Dec 10;13:RP102592. doi: 10.7554/eLife.102592 (PMC11630813; doi:10.7554/eLife.102592)
Supplement: Supplementary file 1. [file elife-102592-supp1.xlsx]

## Sheet: Primers
Primer number	Primer name	Sequence (5' to 3')	Description
1	IST gRNA Fw	acgtccaatgtcgcctatcgttttagagctagaaatagc	Primer to clone the protospacer targeting IST in the pCAS9 vector via inverse PCR
2	pSAG1::cas9 Rev	aacttgacatccccatttac	Generic primer to clone protospacers in the pCAS9 vector via inverse PCR
3	IST 5’UTR Fw	gacgagaggacccagttctgtgggccgtggaagcccggaatcgaaggctgtagtactgg	Primers to amplify the mCherry::HXGPRT repair template with overhangs for integration in the IST locus
4	IST 3’UTR Fw	cgaaacacccaaaaattctgcccgcaaatgcatccacccagtcgactggaactacggtg	Primers to amplify the mCherry::HXGPRT repair template with overhangs for integration in the IST locus
5	IST analysis Fw	gcgtctcaatagcgtgttcg	PCR validation of IST deletion
6	IST analysis Rev	cgtgagacctcacacacatc	PCR validation of IST deletion
7	KO analysis Fw	acgacttcaacgagatgttcc	Generic primers for PCR validation of integration of the mCherry::HXGPRT repair cassette
8	KO analysis Rev	gtgtcgaaacaagctgacac	Generic primers for PCR validation of integration of the mCherry::HXGPRT repair cassette
9	GRA1 prom Fw	catgacgagcactagtggatcactggtgctcgtatgcgac	Primers to clone the GRA1 promoter in the pUPRT plasmid
10	GRA1 prom Rev	ttctttatgtttttggcgtcttccatcttgcttgatttcttcaaagaac	Primers to clone the GRA1 promoter in the pUPRT plasmid
11	ffLuc GRA1 Fw	ttgttctttgaagaaatcaagcaagatggaagacgccaaaaacataaag	Primers to clone the HA C-terminally tagged Firefly Luciferase gene in the pUPRT plasmid
12	ffLuc HA Rev	tacgcgtagtccgggacgtcgtacgggtaggactttccgcccttcttg	Primers to clone the HA C-terminally-tagged Firefly Luciferase gene in the pUPRT plasmid
13	pUPRT Fw	tgtttatcctcttgaggcg	Primers to amplify the backbone of the pUPRT plasmid
14	pUPRT Rev	gatccttccaggaaacgctg	Primers to amplify the backbone of the pUPRT plasmid
