# Supplementary figures and images for: Paracrine rescue of MYR1-deficient Toxoplasma gondii mutants reveals limitations of pooled in vivo CRISPR screens
Source: eLife journal article supplement (doi:10.7554/elife.102592), 2024-10-15

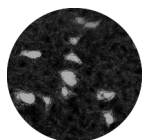

Supplement: fig1-data5 [file elife-102592-fig1-data5-v1.zip]
